1 **Fcrl5 and T-bet define influenza-specific memory B cells that predict long-lived antibody**  
2 **responses**

3  
4 Anoma Nellore<sup>1</sup>, Christopher D. Scharer<sup>2</sup>, Rodney G. King<sup>3</sup>, Christopher M. Tipton<sup>4</sup>, Esther  
5 Zumaquero<sup>3</sup>, Christopher Fucile<sup>3,5</sup>, Betty Mousseau<sup>3</sup>, John E. Bradley<sup>6</sup>, Kevin Macon<sup>3</sup>, Tian Mi<sup>2</sup>,  
6 Paul A. Goepfert<sup>1,3</sup>, John F. Kearney<sup>3</sup>, Jeremy M. Boss,<sup>2</sup> Troy D. Randall<sup>6</sup>, Ignacio Sanz<sup>4</sup>,  
7 Alexander Rosenberg<sup>3,5</sup>, Frances E. Lund<sup>3</sup>

8  
9  
10  
11 <sup>1</sup>Dept. of Medicine, Division of Infectious Disease, <sup>3</sup>Dept. of Microbiology, <sup>5</sup>Informatics Institute,  
12 <sup>6</sup>Dept of Medicine, Division of Clinical Immunology and Rheumatology, at The University of  
13 Alabama at Birmingham, Birmingham, AL 35294 USA

14  
15 <sup>2</sup>Dept. of Microbiology and Immunology and <sup>4</sup>Department of Medicine, Division of  
16 Rheumatology, at Emory University, Atlanta, GA 30322, USA

17  
18  
19  
20  
21  
22  
23  
24  
25  
26  
27  
28 Lead Contact and to whom correspondence should be addressed: [flund@uab.edu](mailto:flund@uab.edu)

29  
30 Mailing address: Frances E. Lund, PhD  
31 Charles H. McCauley Professor and Chair  
32 Dept of Microbiology  
33 University of Alabama at Birmingham (UAB)  
34 Dept of Microbiology  
35 University of Alabama at Birmingham (UAB)  
36 276 BBRB Box 11  
37 1720 2<sup>nd</sup> Avenue South  
38 Birmingham AL 35294-2170

39  
40 SHORT RUNNING TITLE: Effector memory B cell development after influenza vaccination

41

42 **Abstract:** Early surrogates for long-lived immunity after inactivated influenza vaccination (IIV)  
43 are lacking. Antigen-specific memory B cells (Bmem) after IIV have been recently identified. We  
44 show that the antigen-specific Bmem compartment after IIV is heterogenous and comprises a  
45 clonotypically and transcriptionally distinct T-bet<sup>hi</sup> subset that persists in circulation over time  
46 after vaccination and exclusively correlates with the long-lived antibody response. We  
47 demonstrate that this subset has an effector memory transcriptome and is epigenetically  
48 remodeled to facilitate intracellular immunoglobulin production. Finally, via clonal sharing, we  
49 show an enriched *in vivo* ontologic relationship between the secondary plasmablast response  
50 that develops after vaccine boost and the T-bet<sup>hi</sup> fraction of the flu-specific Bmem response that  
51 forms after initial prime. Collectively, our data identify a novel biomarker of durable humoral  
52 immunity after influenza vaccination.

53

54

55 **Keywords:** T-bet, memory B cells, plasmablasts, influenza vaccination, durable immunity

56

57 **Introduction:**

58 After inactivated influenza vaccination (IIV), durable humoral immunity is mediated by  
59 long-lived antibody (Ab) secreting cells (ASCs) and memory B cells (Bmem).<sup>1</sup> In the influenza  
60 experienced adult, inactivated influenza vaccination (IIV) mobilizes pre-existing hemagglutinin  
61 (HA) antigen-specific memory B cell (Bmem) subsets.<sup>2</sup> These responding Bmem may assume  
62 different fates. They may proliferate and affinity mature in the germinal center (GC) response to  
63 produce daughter cohorts of HA-specific Bmem; they may die immediately upon activation; they  
64 may directly differentiate into ASCs; or they may persist as long-term memory. The early cues  
65 that direct vaccine-elicited antigen-specific Bmem toward any of these various fates and the  
66 relationship of these Bmem fate decisions to the development of durable humoral immunity are  
67 not completely clear.

68 Traditionally defined according to expression of the canonical memory marker, CD27,<sup>3-6</sup>  
69 human Bmem are now appreciated to be a heterogeneous subset by transcriptional  
70 programming, differentiation capacity and responsiveness to antigen. For instance, a subset of  
71 atypical Bmem that express the lineage defining transcription factor (TF), T-bet, have been  
72 identified in the context of infection, vaccination, aging and autoimmunity.<sup>7</sup> We recently reported  
73 in a murine model of influenza infection that T-bet expression in flu-specific B cells as necessary  
74 for the development of long-lived ASCs to primary influenza infection as well as for the  
75 development of the secondary ASC (plasmablast or PB) in response to challenge infection.<sup>8</sup>  
76 This finding led us to query the relationship between vaccine-elicited durable immunity and the  
77 early vaccine-specific Bmem response after IIV of healthy human subjects.

78 Here we study the clonotype, transcriptome and epigenome of circulating human Bmem  
79 after IIV strictly classified according to antigen reactivity and T-bet expression. We find that the  
80 BCR inhibitory signaling molecule, FcRL5,<sup>9</sup> accurately identifies HA-specific Bmem by T-bet  
81 expression. We also find HA<sup>pos</sup> T-bet<sup>hi</sup> Bmem are transcriptionally remodeled as effector  
82 memory with increased accessibility at an Xbp1 enhancer locus that aligns with an established  
83 T-bet binding site.<sup>10</sup> We show that the early HA<sup>pos</sup> T-bet<sup>hi</sup> subset predicts the development of  
84 long-lived Ab response to the vaccine. Finally, we demonstrate that HA<sup>pos</sup> T-bet<sup>hi</sup> Bmem clones  
85 are preferentially recalled into the early antigen-specific PB repertoire after re-vaccination.

86 **Results:**

87 **I. T-bet parses phenotypically distinct HA-specific humoral immune readouts after IIV**

88 After inactivated influenza vaccination (IIV), there is an early expansion of the circulating  
89 follicular helper T cell (cTfh, CD4<sup>+</sup>CXCR5<sup>+</sup>PD1<sup>+</sup>ICOS<sup>+</sup> T cell)<sup>11,12</sup> and plasmablast fractions

90 (CD27<sup>pos</sup>CD38<sup>hi</sup>, PB) within 5-10 days of vaccine receipt.<sup>13,14</sup> The plasmablast fraction has  
91 been extensively studied as a measure of vaccine induced antigen-specific humoral immunity.<sup>15-</sup>  
92 <sup>18</sup> However, plasmablasts are rapidly cycling, short-lived cells and therefore do not reflect  
93 longitudinal immune protection after vaccination. Using fluorochrome labeled tetramer or  
94 monomer reagents, hemagglutinin (HA)-specific Bmems have been identified within one month  
95 after IIV.<sup>19-21</sup> This antigen-specific Bmem compartment after IIV has been described as  
96 heterogeneous, comprising typical and atypical memory B cells.<sup>19-21</sup> We wanted to assess the  
97 phenotype and kinetics of the HA-specific Bmem compartment after IIV and the relationship of  
98 this compartment to the plasmablast and long-lived antibody (Ab) response. We hypothesized  
99 that the HA-specific Bmem and plasmablast humoral immune responses are distinct vaccine  
100 outputs. In order to test this hypothesis, we administered the 2015 IIV to 19 healthy subjects  
101 and drew blood at sequential proximal time points (day 0, 7, 14, 21, 28) as well as distant time  
102 points from vaccine receipt (day 120). Detailed vaccination and infectious histories from  
103 subjects were not recorded. Gating strategies are shown in [Supplemental Fig 1 A-C](#). Specificity  
104 of our HA tetramer has been described<sup>22</sup> and, unless specifically indicated, HA tetramer  
105 matches relevant vaccine antigen strain (H1 or H3). Our 2015 cohort responded to the vaccine  
106 as evidenced by a significant increase in the circulating cTfh and PB fraction from day 0 to day 7  
107 of IIV ([Supplemental Figure 1 B,1C](#)). Also within 7 days of IIV, two phenotypically unique  
108 IgD<sup>neg</sup>CD38<sup>med/lo</sup> HA-specific (H1) Bmem populations were identified in circulation. These two  
109 populations are shown in representative FACS plots ([Figure 1A](#)) and are phenotypically distinct  
110 from CD38<sup>hi</sup> B cells and from each other according to HA (H1)-tetramer, Ki-67, T-bet expression  
111 and SSC-A parameters. These HA-specific Bmem subsets were further phenotyped as shown  
112 in [Supplemental Figure 1D](#). Both subsets were enriched in the expression of the canonical  
113 memory B cell marker, CD27 ([Supplemental Figure 1D](#)). Consistent with prior description of  
114 atypical T-bet<sup>hi</sup> B cells,<sup>8,19,20,23-29</sup> we found day 7 HA<sup>pos</sup> T-bet<sup>hi</sup> Bmem to have increased  
115 expression of the integrin CD11c and the inhibitory B cell receptor (BCR) signaling molecule  
116 FcRL5 as well as decreased expression of the chemokine receptor CXCR5 and the complement  
117 receptor CD21. Underscoring these phenotypic differences, we interrogated the morphology of  
118 H1<sup>pos</sup> T-bet<sup>hi</sup> Bmem using ImageStream and found them to be larger and more granular than  
119 H1<sup>pos</sup> T-bet<sup>lo</sup> Bmem ([Supplemental Fig 1E](#)).

120 Ki67 is not a binary marker of proliferation and its expression at any individual timepoint  
121 does not necessarily reflect ongoing or future proliferative potential but may rather reflective  
122 prior replicative history.<sup>30,31</sup> Thus we evaluated for phenotypic changes in Ki-67 expression in  
123 the HA-specific Bmem compartment over time after IIV. We found that Ki-67 expression was

124 not sustained over time in the circulating HA<sup>pos</sup> T-bet<sup>hi</sup> Bmem compartment nor did the  
125 circulating HA<sup>pos</sup> T-bet<sup>lo</sup> compartment develop significant Ki-67 expression over time after  
126 vaccination (Figure 1B). In our 2015 IIV cohort, the HA<sup>pos</sup> (H1 and H3) T-bet<sup>hi</sup> Bmem expanded  
127 in the circulation within one month of IIV (Figure 1C, 1E). However, we did not consistently  
128 observe a parallel expansion in the HA<sup>pos</sup> T-bet<sup>lo</sup> Bmem fraction in this cohort (Figure 1D, 1F).  
129 We found an exclusive correlation between the day 7 cTfh and the day 7 HA<sup>pos</sup> T-bet<sup>hi</sup> Bmem  
130 responses to the 2015 IIV (Supplemental Figure 1 F-I). Finally in our 2015 IIV cohort, we found  
131 no correlations between the magnitudes of the day 7 HA<sup>pos</sup> T-bet<sup>hi</sup> and HA<sup>pos</sup> T-bet<sup>lo</sup> Bmem to  
132 either the PB response (Figure 1 G-H) or to one another (Figure 1 I-J). Collectively, the data  
133 suggest that the day 7 HA<sup>pos</sup> T-bet<sup>hi</sup> and T-bet<sup>lo</sup> Bmem are unique humoral immune outputs to  
134 the IIV.

## 135 II. HA<sup>pos</sup> T-bet<sup>hi</sup> Bmem transcriptionally and epigenetically resemble effector memory

136 T-bet is a lineage defining master transcriptional regulator of terminally differentiated  
137 effector cell subsets<sup>32,33</sup> and its role in B cell differentiation has been studied in various  
138 pathologic in vivo and in vitro contexts.<sup>8,19,20,23-29</sup> Murine studies of influenza infection in wild-  
139 type versus B-Tbx21<sup>-/-</sup> chimeric mice demonstrate that T-bet is necessary for long-lived IgG2c  
140 antibody production after primary infection and dispensable for the development and  
141 maintenance of the flu-specific memory pool after primary infection.<sup>8</sup> However, flu-specific  
142 memory B-TBX21<sup>-/-</sup> cells cannot mount a recall antibody-secreting cell (ASC) response upon  
143 antigen re-challenge. These data suggest that T-bet expression in antigen-specific B cells may  
144 either directly mediate the initial transcriptional commitment toward terminal ASC differentiation  
145 as “pre-ASCs,” or may mediate transcriptional commitment toward effector memory.<sup>34</sup> Existing  
146 transcriptional data sets of circulating human Bmem after IIV have compared the aggregate  
147 Bmem compartment according to expression of atypical cell surface markers, CD71<sup>19</sup> and  
148 CD21.<sup>20</sup> The latter study concluded that CD21<sup>lo</sup> Bmem after IIV had enhanced T-bet expression  
149 and had coincident up-regulation of key ASC transcription factors (TFs), like PRDM1.<sup>20,35-38</sup> We  
150 hypothesized that the transcriptional evaluation of antigen-specific Bmem after IIV strictly  
151 defined by T-bet expression would similarly show T-bet mediated transcriptional commitment  
152 toward terminal ASC differentiation.

153 To test our hypothesis and characterize the transcriptome of HA-specific Bmem by T-bet  
154 expression we used the cell surface marker FcRL5 to sort-purify Ca-H1<sup>pos</sup> T-bet<sup>hi</sup> Bmem, Ca-  
155 H1<sup>pos</sup> T-bet<sup>lo</sup> Bmem, naïve B cells and ASCs for RNA-seq from 6 donors at day 7 after 2017 IIV  
156 The 2017 IIV included the Michigan 2015 (Mi) H1 antigen which only differs from the sort Ca-H1  
157 tetramer by a single mutation and glycosylation residue.<sup>39,40</sup> Figure 2A shows the principal

158 component analysis (PCA) of this transcriptional data. Utilizing FcRL5 as a cell surface  
159 surrogate for T-bet expression accurately classified HA<sup>pos</sup> Bmem according to T-bet and FcRL5  
160 expression status (Figure 2B, Supplemental Fig 2A). For purposes of brevity, hereafter we refer  
161 to the HA-Tet<sup>int</sup> Ki-67<sup>int</sup> T-bet<sup>hi</sup> SSC-A<sup>hi</sup> FcRL5<sup>hi</sup> Bmem response to IIV as “HA<sup>pos</sup> T-bet<sup>hi</sup>” and  
162 the HA-Tet<sup>hi</sup> Ki-67<sup>lo</sup> T-bet<sup>lo</sup> SSC-A<sup>lo</sup> FcRL5<sup>lo</sup> response as “HA<sup>pos</sup> T-bet<sup>lo</sup>.”

163 Expectedly, naïve, Bmem and PB subsets group separately on the PC1 axis. There  
164 were 762 differentially expressed genes (DEGs) identified between H1<sup>pos</sup> T-bet<sup>hi</sup> Bmem and  
165 H1<sup>pos</sup> T-bet<sup>lo</sup> Bmem. There were near equivalent DEGs identified between PBs and H1<sup>pos</sup> T-bet<sup>hi</sup>  
166 (3154) versus PBs and H1<sup>pos</sup> T-bet<sup>lo</sup> Bmem (3571) and H1<sup>pos</sup> T-bet<sup>hi</sup> Bmem did not group more  
167 closely to PBs on either the PC1 or PC2 axis relative to H1<sup>pos</sup> T-bet<sup>lo</sup> Bmem. Consistent with this  
168 observation, we saw no differences in the gene expression (reads per kilobase per million,  
169 RPKM) between HA<sup>pos</sup> T-bet<sup>lo</sup> Bmem and HA<sup>pos</sup> T-bet<sup>hi</sup> Bmem at key ASC defining TFs like  
170 PRDM1,<sup>36-38</sup> XBP1,<sup>41,42</sup> IRF4<sup>43,44</sup> (Figure 2B). Instead we saw differential expression between  
171 HA<sup>pos</sup> T-bet<sup>hi</sup> Bmem and HA<sup>pos</sup> T-bet<sup>lo</sup> Bmem at key effector cell TFs, like Zeb2,<sup>45,46</sup> chemokine  
172 receptor, CXCR3 that is a direct downstream target of TBX21,<sup>33</sup> and a chemokine that  
173 distinguishes effector from central memory, CCR7.<sup>47</sup> We compared our transcriptional analysis  
174 to curated gene lists of cell cycle genes and apoptosis genes (Qiagen RT2 profiler) (Figure 2C).  
175 Expectedly we found that the vaccine elicited PBs, which are known to proliferate and are short-  
176 lived, had differential expression at a number of cell cycle and apoptosis genes. Consistent with  
177 transient expression of Ki-67 over time in the HA<sup>pos</sup> T-bet<sup>hi</sup> Bmem, we did not find significant  
178 differences in cell cycle genes between day 7 H1<sup>pos</sup> T-bet<sup>hi</sup> and day 7 H1<sup>pos</sup> T-bet<sup>lo</sup> Bmem.  
179 Consistent with terminal effector cell remodeling, we found that day 7 H1<sup>pos</sup> T-bet<sup>hi</sup> Bmem  
180 upregulated pro- apoptotic genes, like Fas, and down-regulated anti-apoptotic genes, like Bcl2,  
181 in comparison to day 7 H1<sup>pos</sup> T-bet<sup>lo</sup> Bmem. Finally we performed gene set enrichment  
182 analysis (GSEA) against curated gene sets with effector T cell genes (Figure 2D, Supplemental  
183 2B)<sup>48-50</sup> and found significant enrichment between the DEGs of day 7 HA<sup>pos</sup> T-bet<sup>hi</sup> Bmem over  
184 day 7 HA<sup>pos</sup> T-bet<sup>lo</sup> Bmem and these gene lists.

185 Next we asked whether HA<sup>pos</sup> T-bet<sup>hi</sup> Bmem were epigenetically more similar to PBs than  
186 HA<sup>pos</sup> T-bet<sup>lo</sup> Bmem. To test this we used the cell surface marker FcRL5 to sort purify day 7  
187 H1<sup>pos</sup> T-bet<sup>hi</sup>, H1<sup>pos</sup> T-bet<sup>lo</sup> Bmem, PBs and H1<sup>neg</sup> T-bet<sup>hi</sup> Bmem to assess chromatin  
188 accessibility in these subsets using ATAC-seq. We found 1923 significant differentially  
189 accessible regions (DARs) between HA<sup>pos</sup> T-bet<sup>hi</sup> and HA<sup>pos</sup> T-bet<sup>lo</sup> populations. We also  
190 identified 10,464 and 11,362 DARs between ASCs and HA<sup>pos</sup> T-bet<sup>lo</sup> and T-bet<sup>hi</sup> Bmem  
191 respectively. PCA representation of this ATAC-seq data is shown Figure 2E with PBs grouping

192 distinctly from both HA<sup>pos</sup> Bmem subsets. We assessed the accessibility of genes known to be  
193 targets of the ASC TF IRF4 in plasma cells<sup>51</sup> across these various populations and we found no  
194 difference in accessibility at these genes among HA<sup>pos</sup> T-bet<sup>hi</sup> and HA<sup>pos</sup> T-bet<sup>lo</sup> Bmem ([Figure](#)  
195 [2F](#)). Finally, we analyzed our accessibility and transcriptional data concordantly using  
196 PAGERANK (PR) analysis<sup>52</sup> to discern TF motifs that result in changes in gene expression of  
197 target genes. We identified 706 TFs that were predicted by PR to contribute to the transcription  
198 gene networks of D7 HA<sup>pos</sup> T-bet<sup>hi</sup> over D7 HA<sup>pos</sup> T-bet<sup>lo</sup> Bmem ([Figure 2G](#)). Notably no ASC  
199 defining TF network was identified by the PR algorithm with a log<sub>2</sub> fold change of >1. However,  
200 PR predicted the significant up-regulation of TF networks TBX21, BATF,<sup>53</sup> BHLHE40,<sup>54</sup> and the  
201 downregulation of TF network TCF7,<sup>55</sup> consistent with effector immune cell programming.  
202 Collectively, these data do not support that HA<sup>pos</sup> T-bet<sup>hi</sup> Bmem at day 7 after vaccination are  
203 transcriptionally or epigenetically committed to terminal differentiation as ASCs. Rather these  
204 data support that day 7 HA<sup>pos</sup> T-bet<sup>hi</sup> Bmem are distinguished by an effector memory cell  
205 program. Further analysis comparing the transcriptome and chromatin accessibility of day 14  
206 HA<sup>pos</sup>T-bet<sup>hi</sup> over day 14 HA<sup>pos</sup> T-bet<sup>lo</sup> Bmem replicated the transcriptional and epigenetic  
207 findings described above at the day 7 time point. ([Supplemental Fig 2C, 2D, 2E](#))

### 208 **III. HA<sup>pos</sup> T-bet<sup>hi</sup> Bmem are transcriptionally remodeled to facilitate intracellular HA-** 209 **specific immunoglobulin production**

210 B cell differentiation into ASCs is known to be epigenetically regulated in a division  
211 dependent manner<sup>56,57</sup> and cell cycle arrest facilitates terminal immune cell differentiation.<sup>58</sup> Top  
212 up-regulated TFs in the PR analysis of the day 7 antigen-specific T-bet<sup>hi</sup> over T-bet<sup>lo</sup> Bmem  
213 network, include SOX5 and E2F7 ([Figure 2L](#)), and these TFs inhibit cell proliferation and/or  
214 effect cell cycle arrest.<sup>59-61</sup> Concordantly, the PAX5 target molecule, Bach2,<sup>62,63</sup> is  
215 downregulated in the PR analysis of the day 7 HA<sup>pos</sup> T-bet<sup>hi</sup> over T-bet<sup>lo</sup> network, and this  
216 downregulation facilitates ASC differentiation in a division dependent manner.<sup>64,65</sup> PR identified  
217 CDKN2C or p18INK4 as a significant DEG target in the predicted E2F7 regulatory network of  
218 day 7 HA<sup>pos</sup> T-bet<sup>hi</sup> over HA<sup>pos</sup> T-bet<sup>lo</sup> Bmem ([Figure 2E](#)). Interestingly, CDKN2C has previously  
219 been demonstrated as critical to the development of the immunoglobulin production and  
220 secretory function of ASCs by inhibiting G1/S cell cycle progression.<sup>66-68</sup> From these  
221 transcriptional and epigenetic network analyses we hypothesized that day 7 HA<sup>pos</sup> T-bet<sup>hi</sup> Bmem  
222 may be distinguished by intracellular HA-specific immunoglobulin (Ig) production. To test this  
223 hypothesis, we used ImageStream to visualize, enumerate and compare the external  
224 (extracellular, EC) and internalized (internalized, intracellular IC) H1-tetramer intensity score  
225 (IDEAS software) among circulating PBs, T-bet<sup>hi</sup> and T-bet<sup>lo</sup> Bmem within 7 days of IIV.

226 Representative images of day 7 T-bet<sup>lo</sup>, T-bet<sup>hi</sup> and CD38<sup>hi</sup> B cells are shown in [Figure 3A](#).  
227 HA intensity score ([Figures 3B, 3C](#)) among aggregate cells demonstrate, expectedly, that  
228 CD38<sup>hi</sup> cells have the highest intensity score for H1-tetramer internal stain among these three  
229 subsets. Interestingly, the intracellular intensity score of H1-tetramer stain in the T-bet<sup>hi</sup> Bmem  
230 compartment significantly exceeds that of T-bet<sup>lo</sup> Bmem. We also assessed our ImageStream  
231 data using an unsupervised analytic platform, FLOCK, to identify clusters of cells with shared  
232 expression patterns of fluorochrome labeled targets. FLOCK independently identified a cluster  
233 of cells with high CD38 and intracellular H1-tetramer expression (green) as well as a cluster of  
234 cells with intermediate expression of intracellular H1-tetramer, low CD38 expression and high  
235 expression of T-bet (red) ([Supplemental 2F-H](#)). These data provide functional evidence that day  
236 7 HA<sup>pos</sup> T-bet<sup>hi</sup> Bmem produce more intracellular flu-Ig than HA<sup>pos</sup> T-bet<sup>lo</sup> Bmem.

237 T-bet expression has been associated with altered metabolic programming of effector T  
238 cells.<sup>69,70</sup> Our finding that HA<sup>pos</sup> T-bet<sup>hi</sup> Bmem have intermediate production of intracellular  
239 immunoglobulin prompted us to query the relationship between T-bet expression in HA<sup>pos</sup> Bmem  
240 and the unfolded protein response (UPR). First we compared the DEGs between day 7 naïve B  
241 cells, PBs, HA<sup>pos</sup> T-bet<sup>hi</sup> Bmem and HA<sup>pos</sup> T-bet<sup>lo</sup> Bmem to a curated list of genes associated  
242 with UPR (Qiagen RT2 Profiler) ([Figure 3D](#)). We found that PBs almost exclusively upregulated  
243 the genes known to be associated with UPR. Next we used PR analysis to identify TFs that  
244 regulate the gene network of day 7 HA<sup>pos</sup> T-bet<sup>hi</sup> Bmem over day 7 PBs. Not surprisingly, we  
245 found that PR predicted down-regulation of master ASC TFs, Xbp1, PRDM1 and IRF4, as well  
246 as master regulators of UPR, ATF4, in day 7 HA<sup>pos</sup> T-bet<sup>hi</sup> Bmem ([Figure 3E](#)).<sup>71</sup> Thus, our  
247 transcriptional and epigenetic data do not demonstrate that T-bet expression in HA-specific  
248 Bmem is associated with the development of UPR.

249 We interrogated our transcriptional gene set further to understand the role of T-bet  
250 expression in B cell metabolism by using GSEA to compare the DEGs between day 7 H1<sup>pos</sup>T-  
251 bet<sup>hi</sup> Bmem over H1<sup>pos</sup> T-bet<sup>lo</sup> Bmem to Gene Ontology (GO) gene sets. We found enrichment  
252 against GO terms that clustered into 3 groups according to shared leading edge gene lists.  
253 Representative GSEA plots of these 3 clusters are shown in [Figure 3F](#) and clusters 1 and 2  
254 pertain to cellular metabolism and mitochondrial respiration. We used Ingenuity Pathway  
255 Analysis IPA) on cluster 2 leading edge genes to understand predicted upstream regulators of  
256 that gene set ([Figure 3G](#)). This cluster was chosen because there were sufficient leading edge  
257 genes to permit this type of analysis. IPA predicted regulators of the metabolism cluster include  
258 modulators of metabolic transitions to aerobic glycolysis (PCGEM1,<sup>72</sup> LONP1<sup>73</sup> and TRAP1<sup>74</sup>),  
259 as well as established mediators of effector cell sustained respiratory capacity (SRC), IL-15.<sup>75</sup>



260 Finally we examined the genome plot of our ATAC-seq data at the Xbp1 locus to assess for  
261 DARs at this gene. Of note, Xbp-1 is not a target gene in the [Staudt et al Nature 2008](#) gene list  
262 and accessibility at this locus is not shown in [Figure 2F](#). We identified a DAR (FDR = 0.03) at  
263 an Xbp-1 enhancer site between day 7 HA<sup>pos</sup> T-bet<sup>hi</sup> over HA<sup>pos</sup> T-bet<sup>lo</sup> Bmem that persists at  
264 day 14 after vaccination (FDR <0.0004) ([Figure 3H, Supplemental 2I](#)) with predicted RUNX, Ets  
265 and PU.1/IRF binding motifs. Although there are no predicted TBX21 binding motifs at this site,  
266 this DAR directly aligns to peaks identified by published Tbx21 ChIP-seq data of GM12878  
267 cells.<sup>10</sup> Collectively, these data suggest that T-bet expression in HA<sup>pos</sup> Bmem is associated with  
268 altered mitochondrial respiration and cellular metabolism parameters and may facilitate  
269 intracellular immunoglobulin production/UPR by associating with TF complexes at an Xbp1  
270 enhancer locus to effect increased Xbp1 chromatin accessibility.

#### 271 **IV. Clonotypes from HA<sup>pos</sup> T-bet<sup>hi</sup> Bmem Exclusively Persist in the Circulation**

272 Our data show that HA<sup>pos</sup> T-bet<sup>hi</sup> Bmem have distinct kinetics from HA<sup>pos</sup> T-bet<sup>lo</sup> Bmem  
273 after vaccination suggesting that this subset may also be clonotypically distinct from HA<sup>pos</sup> T-  
274 bet<sup>lo</sup> Bmem. To test this possibility we used FcRL5 as a cell surface marker of T-bet expression  
275 [[Supplemental Fig 1D](#)] to sort purify HA<sup>pos</sup> Bmem by T-bet expression from the peripheral blood of  
276 three subjects (donor 1, 2, 3) at various timepoints after 2016-7 IIV for BCR sequencing. Unique  
277 clones across subsets were identified as having the same V<sub>H</sub>- and J<sub>H</sub>- gene annotations,  
278 identical length at the CDR3-H and at least 85% sequence similarity between the CDR3.

279 [Figure 4A](#) shows representative clonality plots of H3<sup>pos</sup> T-bet<sup>hi</sup> and H3<sup>pos</sup> T-bet<sup>lo</sup> Bmem  
280 with the number of sequences retrieved from each subset and the number of lineages resolved  
281 from these sequences also represented. BCR repertoire diversity within each subset was  
282 assessed through a variety of metrics including the number of clonotypes that composed the top  
283 20% or 50% of all sequences (D<sub>20</sub>, D<sub>50</sub>). Circulating day 7 H3<sup>pos</sup> T-bet<sup>lo</sup> Bmem were  
284 clonotypically more diverse than circulating day 7 H3<sup>pos</sup> T-bet<sup>hi</sup> Bmem ([Figure 4A](#)) in both donor  
285 1 and 2 (Donor 1: D<sub>20</sub>, T-bet<sup>lo</sup> 29 vs. T-bet<sup>hi</sup> 14, D<sub>50</sub>, T-bet<sup>lo</sup> 151 vs T-bet<sup>hi</sup> 82; Donor 2: D<sub>20</sub>, T-  
286 bet<sup>lo</sup> 3 vs. T-bet<sup>hi</sup> 1, D<sub>50</sub> T-bet<sup>lo</sup> 11 vs T-bet<sup>hi</sup> 3).

287 Next we examined the frequency of shared clones between the H3<sup>pos</sup> T-bet<sup>hi</sup> or H3<sup>pos</sup> T-  
288 bet<sup>lo</sup> Bmem populations in donors 1 and 2 ([Figure 4B](#)). We found that 6.1% and 5.1% of H3<sup>pos</sup> T-  
289 bet<sup>hi</sup> Bmem clones from donors 1 and 2 respectively were shared with clones from H3<sup>pos</sup> T-bet<sup>lo</sup>  
290 Bmem. Conversely, we found that 4.2% and 1.9% of H3<sup>pos</sup> T-bet<sup>lo</sup> Bmem clones from donors 1  
291 and 2 respectively were shared with clones from the corresponding H3<sup>pos</sup> T-bet<sup>hi</sup> Bmem subset.  
292 These data indicate that HA<sup>pos</sup> T-bet<sup>hi</sup> Bmem are largely clonotypically distinct from HA<sup>pos</sup> T-bet  
293 <sup>lo</sup> Bmem at a single time point. However, we also wanted to understand if the relationships

294 between these populations over time. Therefore we amplified the BCR sequences at day 14  
295 after IIV in donor 1 according to H3 and T-bet expression for comparison to day 7 antigen-  
296 specific clones. We found that a greater proportion of large day 14 H3<sup>pos</sup> T-bet<sup>hi</sup> Bmem clones  
297 were enriched in unique clones from day 7 H3<sup>pos</sup> T-bet<sup>hi</sup> Bmem population as compared to day 7  
298 H3<sup>pos</sup> T-bet<sup>lo</sup> Bmem population (Figure 4 D, Figure 4 F). In contrast, we found that clones from  
299 day 14 H3<sup>pos</sup> T-bet<sup>lo</sup> Bmem were related to very few unique clones from day 7 H3<sup>pos</sup> T-bet<sup>lo</sup>  
300 Bmem subset (Figure 4 C, Figure 4 E). These observations remained true even at 100% CDR3  
301 similarity (Supplemental File 2). We evaluated clonotypic relationships between HA<sup>pos</sup> T-bet<sup>hi</sup>  
302 and HA<sup>pos</sup> T-bet<sup>lo</sup> Bmem at additional time points after IIV in a separate donor and again  
303 detected that large clones of day 28 H1<sup>pos</sup> T-bet<sup>hi</sup> Bmem were enriched for unique clonotypes  
304 from day 14 H1<sup>pos</sup> T-bet<sup>hi</sup> Bmem over day 14 H1<sup>pos</sup> T-bet<sup>lo</sup> Bmem (Supplemental 3A-C).

### 305 **V. HA<sup>pos</sup>T-bet<sup>hi</sup> Bmem Exclusively Correlate with the Long-lived Ab Response after IIV**

306 In order to understand the relationship of circulating HA<sup>pos</sup> T-bet<sup>hi</sup> and HA<sup>pos</sup> T-bet<sup>lo</sup>  
307 Bmem to each other and to any vaccine elicited germinal center response, we assessed the  
308 heavy chain mutation rates between total and related antigen-specific T-bet<sup>hi</sup> and T-bet<sup>lo</sup> Bmem  
309 clones at matched time points (donor 1: day 7, day 14; donor 2: day 7, donor 3: day 14, day 28)  
310 We also assessed the heavy chain mutation rates among shared antigen-specific T-bet<sup>hi</sup> clones  
311 across time in donor 1 (day 7 to day 14) and donor 3 (day 14 to day 28). We were unable to  
312 resolve any consistent directionality (increased or decreased) in total, silent or non-silent  
313 mutation rate differences among total or shared clonotypes by T-bet expression status.

314 The influenza antigen-specific Bmem compartment is significantly mutated as a result of  
315 repeated infectious exposure and/or inoculations. Thus, the incremental differences in heavy  
316 chain mutation across antigen-specific Bmem subsets after vaccination may be subtle and this  
317 may not be the appropriate read-out of the germinal center response to vaccination.<sup>20</sup> Therefore  
318 we cloned single Ca-H1<sup>pos</sup> Bmem by T-bet/FcRL5 expression for recombinant monoclonal  
319 antibody (rMAb) generation from three donors after 2017 IIV (donor 1, day 7; donor 3, day 14;  
320 donor 4 day 14) to assess for binding to a panel of H1 antigens (California-H1, Ca7, Michigan-  
321 15, Mi15, and Puerto Rico/8, PR8) in a multiplex bead assay as has been described  
322 previously.<sup>76,77</sup> We did not find any difference in relative binding reactivity to either the vaccine  
323 antigen, Mi15, or the closely related sort antigen, Ca7 (Figure 4G). However, we observed an  
324 enrichment in PR8 reactive clones among rMAbs generated from individual Ca-H1<sup>pos</sup> T-bet<sup>hi</sup>  
325 Bmem (Figure 4G). Regardless of T-bet expression status, those clones with highest PR8  
326 reactivity had relatively lower relative binding avidity for the vaccine H1 antigen, Mi15 or the  
327 closely related Ca7 antigen than non-PR8 reactive clones. PR8 is antigenically more similar to

328 pre-2009 circulating and inoculating H1N1 strains that diverged from swine early in the 20<sup>th</sup>  
329 century<sup>78</sup> and is less similar to more recently circulating and inoculating H1N1 strains like Mi15  
330 and Ca7 that are directly adapted from contemporaneous swine H1 strains.<sup>79</sup> Thus, enrichment  
331 of PR8 reactive clones in the T-bet<sup>hi</sup> repertoire suggests that the repertoire of this fraction may  
332 preferentially contain clones from temporally distant exposures to influenza viral variants.  
333 Collectively, these BCR repertoire data suggest that HA<sup>pos</sup> T-bet<sup>hi</sup> Bmem are clonally dissimilar  
334 from the HA<sup>pos</sup> T-bet<sup>lo</sup> Bmem repertoire.

335 Although we were unable to resolve differences in the mutation rates or relative binding  
336 avidity to vaccine antigen of HA<sup>pos</sup> Bmem by T-bet expression status, the unique persistence of  
337 HA<sup>pos</sup> T-bet<sup>hi</sup> clonotypes in the circulation across one month after IIV suggests that these may  
338 mark the presence and or represent direct outputs of an ongoing germinal center response. We  
339 further hypothesized that the long-lived antibody response would therefore correlate with the  
340 magnitude of the HA<sup>pos</sup> T-bet<sup>hi</sup> Bmem response as the long-lived antibody responses to antigen  
341 is impaired in the absence of germinal center responses.<sup>80</sup>

342 As a measure of durable humoral immunity induced by vaccination, we calculated the  
343 fold change in the HA IgG Ab titer between days 0 and 120 after IIV. Expectedly, we found no  
344 correlation between the magnitude of the day 7 PB response and long-lived antibody after 2015  
345 IIV ([Supplemental Figure 1J-K](#)). However, the H1 and H3 long-lived Ab response correlated with  
346 the peak day 7 H1 and H3 T-bet<sup>hi</sup> Bmem response ([Figure 5 A-D](#)). Notably, this correlation was  
347 antigen-specific as the day 7 H1<sup>pos</sup>-T-bet<sup>hi</sup> Bmem did not correlate with the long-lived H3 Ab  
348 response and vice versa ([Supplemental Fig 1L-M](#)). We found similar antigen-specific  
349 correlations exclusively between the D14 HA-specific T-bet<sup>hi</sup> Bmem and the long-lived Ab  
350 response ([Supplemental Figure 1 N-S](#)). Therefore, these data suggest that HA-specific T-bet<sup>hi</sup>  
351 Bmem may serve as a putative early biomarker of the long-lived antibody response after IIV.

## 352 **VI. T-bet<sup>hi</sup> Bmem clonotypes are preferentially recalled into the PB repertoire**

353 Effector memory B cells have been described as resident in the murine lung tissue and  
354 directly differentiate into ASCs after antigen re-challenge.<sup>22</sup> Our transcriptional data suggests  
355 that HA<sup>pos</sup> T-bet<sup>hi</sup> Bmem are effector memory B cells and therefore we hypothesized that this  
356 subset will directly form ASCs after antigen re-challenge. To test this hypothesis we re-  
357 vaccinated 2 cohorts of subjects across sequential vaccine years (2015 and 2016; 2016 and  
358 2017) and assessed the magnitude of the HA<sup>pos</sup> T-bet<sup>hi</sup> and HA<sup>pos</sup> T-bet<sup>lo</sup> Bmem response within  
359 7 days of vaccine receipt in each year. We found a significant increase in HA-titer after vaccine  
360 ([Figure 5E](#)), demonstrating that all 10 subjects responded to the prime and had relatively high  
361 titers of HA-Ab prior to vaccine boost. We found that re-vaccination contracted the HA<sup>pos</sup> T-bet<sup>hi</sup>

362 Bmem fraction but did not significantly alter the magnitude of the total day 7 HA<sup>pos</sup> Bmem or the  
363 day 7 HA<sup>pos</sup> T-bet<sup>lo</sup> Bmem response (Figure 5F-H) across vaccine seasons. Next we compared  
364 the 2016 HA<sup>pos</sup> T-bet<sup>hi</sup> and HA<sup>pos</sup> T-bet<sup>lo</sup> Bmem clonotypes to those of the 2016 and 2017 PB  
365 subset in 3 subjects who received IIV in 2016 and 2017. Expanded clones in the 2017 PB  
366 repertoire were preferentially related to clones from the 2016 HA<sup>pos</sup> T-bet<sup>hi</sup> Bmem subset under  
367 both 85% and 100% CDR3 similarity constraints (Figure 5 I-K, Supplemental Figure 3 D,  
368 Supplemental File 2). These data suggest that clonotypes HA<sup>pos</sup> T-bet<sup>hi</sup> Bmem directly seed the  
369 secondary ASC compartment to provide immune protection after challenge infection.

370

## 371 Discussion

372 Here we define two HA-specific Bmem subsets that circulate within seven days of IIV  
373 and have differential expression of the lineage defining TF T-bet. We show that T-bet  
374 expression divides the HA-specific Bmem compartment into effector memory (TCF7<sup>lo</sup>, CCR7<sup>lo</sup>)  
375 and central memory compartments (TCF7<sup>hi</sup>, CCR7<sup>hi</sup>). Consistent with an effector memory  
376 profile, we show that HA<sup>pos</sup> T-bet<sup>hi</sup> Bmem exclusively persist in the blood compartment within  
377 one month of vaccination and that clonotypes of this subset are recalled into the circulating  
378 expanded PB lineages upon antigen re-challenge.

379 T-bet expressing B cells have been described in the context of aging, autoimmunity,  
380 infection, and vaccination as atypical memory and this subset is now regarded as  
381 heterogeneous.<sup>7</sup> For instance, CD27<sup>neg</sup> T-bet<sup>hi</sup> Bmem (double negative 2, DN2) have been  
382 shown in lupus subjects as an activated extrafollicular B cell subset that arise directly from naïve  
383 B cells and respond to IL-21 and TLR7 signaling alone to differentiate into ASCs.<sup>25,81</sup> However,  
384 this same population has been characterized in patients with chronic infection from HIV, HCV  
385 and malaria as exhausted and unresponsive to BCR signaling.<sup>82-85</sup> In contrast to these studies,  
386 our study reports DEGs between antigen-specific Bmem that are enriched in canonical CD27  
387 expression by T-bet expression (Supplemental Figure 1D) While there are multiple shared  
388 targets in our gene list and gene lists that compare DN2 to canonical memory (e.g. TBX21,  
389 CXCR5, Tcf7, Zeb2, Bach2, ITGAX) there are also important differences. Notably DN2  
390 exclusively upregulate IL21R expression relatively to canonical memory, suggesting the DN2  
391 subset and the HA<sup>pos</sup> T-bet<sup>hi</sup> Bmems described here have different ontogeny, cytokine  
392 responsiveness and consequent functions *in vivo*.

393 In the context of vaccination against influenza, atypical memory B cells have been  
394 identified in the HA-specific Bmem compartment with T-bet expression.<sup>19,20</sup> Our study is  
395 distinguished from these previous reports because we did not discern a pre-ASC transcriptional

396 signature in the atypical Bmem compartment after IIV. Rather we found that the antigen-specific  
397 T-bet<sup>hi</sup> Bmem subset to retain transcriptional and epigenetic programming as effector memory.  
398 This discrepancy in findings may pertain to differences in study design with respect to the  
399 inclusion of antigen-specific versus aggregate vaccine-elicited atypical Bmem in transcriptional  
400 analysis, the transcriptional timepoint under study after vaccination (day 7 vs day 14), and the  
401 use of different cell surface surrogates to parse Bmem into subsets with consequent  
402 heterogeneity in the resolution of the T-bet dependent programming signature ([Supplemental](#)  
403 [Fig 1D, Supplemental Figure 2A](#)).

404 Effector immune cells are distinguished from central immune cells according to cellular  
405 metabolism, respiration and mitochondrial dynamics.<sup>75,86,87</sup> Although it is currently unclear if  
406 metabolic re-programming alone directly shapes cellular fate decisions,<sup>88</sup> TFs that orchestrate  
407 terminal cellular fate commitments concordantly orchestrate cellular metabolic program  
408 changes.<sup>70</sup> ASCs are a terminally differentiated effector cell of the humoral immune arm. This  
409 differentiation is mediated by PRDM1 beyond an early timepoint.<sup>36</sup> Production of  
410 immunoglobulin by ASCs is a nutrient intensive process that requires cellular adaptation termed  
411 the unfolded protein response (UPR). ASCs exhibit a transcriptionally unique UPR from other  
412 cell types that is felt to occur early in ASC differentiation and prior to high Ig secretion.<sup>89-91</sup>  
413 Xbp1/IRE-1 is a key regulator of the ASC UPR<sup>41,42</sup> and its expression in B cells is directly  
414 modulated by PRDM1 as part of terminal ASC differentiation.<sup>91,92</sup> Here we show a significant  
415 DAR at an Xbp1 enhancer locus between the HA<sup>pos</sup> T-bet<sup>hi</sup> over HA<sup>pos</sup> T-bet<sup>lo</sup> Bmem subsets  
416 that is located at a published TBX21 ChIP-seq binding site.<sup>10</sup> Although Xbp1 has been shown  
417 to be dispensable for plasma cell terminal differentiation, absence of Xbp1 attenuates Ig  
418 secretory function.<sup>93</sup> In fact, PRDM1 has been demonstrated as dispensable for the initiation of  
419 Ab secretion.<sup>36</sup> In keeping with this finding, the change in Xbp1 locus accessibility that we  
420 observed in HA<sup>pos</sup> T-bet<sup>hi</sup> Bmem is unlikely to be regulated by PRDM1 as there are no predicted  
421 PRDM1 binding motifs at this enhancer site. Thus, while our data do not suggest that HA<sup>pos</sup> T-  
422 bet<sup>hi</sup> Bmem have made a transcriptional or epigenetic commitment to PRDM1-mediated terminal  
423 ASC differentiation, our data do suggest that T-bet manipulates the metabolic programming of  
424 HA<sup>pos</sup> Bmem via DNA binding effects at the Xbp1 locus to facilitate chromatin accessibility at  
425 that site with consequent intracellular immunoglobulin production. It is also possible that there  
426 are DNA binding independent effects of T-bet on HA<sup>pos</sup> B cell metabolism through functional Bcl-  
427 6 antagonism,<sup>69</sup> as has been described in the context of CD4 T cell effector function, but these  
428 are not clearly elucidated in the transcriptional network analysis presented here.

429 Bone marrow resident long-lived ASCs mediated durable immunity and are distinguished  
430 from other ASC subsets, including PBs, by metabolic programs like autophagy as well as  
431 morphologic and phenotypic characteristics like the expression of surface Ig.<sup>94,95</sup> Current early  
432 immune readouts after IIV, include early antigen-specific PBs and cTfh and are not known to  
433 predict durable immunity after vaccination.<sup>11,95,96</sup> In fact, in our 2015 IIV cohort, the magnitude of  
434 the day 7 plasmablast and cTfh response did not correlate with the fold change in HA-IgG titer  
435 at day 120 after vaccination ([Supplemental Fig 1J-K](#)) In the absence of germinal centers, the  
436 long-lived ASC response is impaired.<sup>80</sup> Consistent with this finding, network analysis of PBMC  
437 transcriptome datasets after IIV correlate early proliferation gene signatures with the  
438 development of an antibody response.<sup>97</sup> Our data demonstrate a correlation between the  
439 circulating early HA<sup>pos</sup> T-bet<sup>hi</sup> response and long-lived HA IgG titer that is antigen specific. These  
440 data suggest that the HA<sup>pos</sup> T-bet<sup>hi</sup> Bmem subset reflects the induction of a new germinal center  
441 response by the IIV. Although we were unable to demonstrate, via incremental increases in  
442 mutation rates or increase in HA binding affinity, evidence that either HA<sup>pos</sup> T-bet<sup>hi</sup> or T-bet<sup>lo</sup>  
443 Bmem are direct outputs of a new GC response to vaccine, we did find exclusive persistence of  
444 HA<sup>pos</sup> T-bet<sup>hi</sup> Bmem clonotypes in circulation and an enriched reactivity of these clonotypes to  
445 H1 viral variants ([Figure 4G](#)). These findings may reflect this subset's origin from an ongoing  
446 GC response ([Figure 5L](#)), which is less stringent to the selection of B cells by affinity/epitope  
447 reactivity.<sup>98-100</sup>

448 It is as yet unclear if circulating HA<sup>pos</sup> T-bet<sup>hi</sup> Bmem simply serve as a biomarker of the  
449 long-lived ASC response or actually represent the direct precursors of bone marrow resident  
450 long-lived ASCs. In this study we used serial annual influenza vaccination of three subjects with  
451 the 2016 and 2017 IIV to follow the fate of circulating HA-specific Bmem clonotypes by T-bet  
452 expression after antigen re-challenge. The 2016 and 2017 IIV formulations were highly  
453 conserved as they shared the same H3 and influenza B antigens and only differed according to  
454 the H1 antigen (Ca-H1 vs Mi-H1). In fact, these two H1 antigens were also highly similar  
455 between formulations, distinguished only by a single K166Q mutation and an adjacent N-linked  
456 glycosylation site.<sup>39</sup> Sequential influenza vaccination with conserved antigens has been shown  
457 to attenuate the vaccine-specific plasmablast<sup>101</sup> and Bmem response<sup>17</sup> possibly because pre-  
458 existing Ab mediate epitope masking or epitope clearance.<sup>102</sup> We did not observe a reduction in  
459 the total or T-bet<sup>lo</sup> HA<sup>pos</sup> Bmem fraction after re-vaccination ([Figure 5F](#)). This discrepancy from  
460 prior reports may be due to our directly enumerating the antigen-specific Bmem compartment  
461 versus assaying the compartment indirectly via ELISPOT as was done previously. However,  
462 and in keeping with prior reports,<sup>17,101</sup> we observed relatively fewer accumulations of

463 connections between PB clones across successive vaccine seasons than between T-bet<sup>hi</sup>  
464 Bmem and PB clones in two of three donors tested [Figure 5I, J, Supplemental 3D].

465 It is interesting to note that large lineages from the circulating 2016 D7 HA<sup>pos</sup> T-bet<sup>hi</sup>  
466 subset were not consistently recalled into the 2017 PB compartment after repeat IIV [Figure 5K].  
467 The fate of these large clonotypes is not clear. They may have differentiated into short or long-  
468 lived ASCs or may have died in the intercurrent time period between sequential vaccines.  
469 Recent data demonstrate HA-specific Bmem in non-lymphoid tissues like the human lung as  
470 enriched in atypical memory marker expression.<sup>3</sup> In fact, CXCR3<sup>+</sup> flu-specific effector Bmem in  
471 the murine lung are broadly reactive against HA viral variants<sup>103</sup> and directly differentiate into  
472 ASCs after antigen challenge for local immune protection.<sup>22</sup> These data suggest raise the  
473 alternative possibility that circulating expanded HA<sup>pos</sup> T-bet<sup>hi</sup> Bmem clones migrate and are  
474 maintained in non-lymphoid tissues as resident effector memory against influenza viral variants  
475 [Figure 5L]. Elucidating clonotypic relationships among effector and central HA-specific Bmem  
476 at various human tissue sites (blood, lymphoid, mucosal) and with the circulating flu-specific Ig  
477 repertoire will be an important goal of future studies.

478 **Author Contributions:** F.E.L. conceived the idea for the project and secured the initial funding.  
479 F.E.L. and A.N. designed the experiments that were performed by A.N., C.D.S., R.G.K, C.M.T.,  
480 E.Z., B.M. and K.M. B cell tetramers were developed and produced by J.E.B. Human samples  
481 used in this study were obtained via the Alabama Vaccine Research Clinic, directed by P.A.G.  
482 Bioinformatic analyses were performed by A.F.R, C.D.S., C.F. and T.M. All other data was  
483 analyzed by A.N and F.E.L. A.N., A.F.R. and F.E.L wrote the manuscript and prepared final  
484 figures. Critical feedback on the project and manuscript were provided by A.F.R, T.D.R, J.F.K.,  
485 I. S., and J.M.B.



486 **Acknowledgements:** We thank the Alabama Vaccine Research Clinic and particularly Pamela  
487 Cunningham, Heather Logan, Aeryn Peck, Catrena Johnson and Megan Oelschig for recruiting  
488 and consenting subjects for this study. We also thank Vidyasagar Hanumanthu, director of the  
489 UAB Flow Core Facility, for his assistance with flow sorts and ImageStream experiments. We  
490 are grateful to Amy S. Weinmann for her thoughtful commentary regarding this manuscript.  
491 Funding for the work was provided by the US National Institutes of Health (NIH): P01 AI125180  
492 (I.S., F.E.L, J.M.B, C.D.S), U19 AI 109962 (F.E.L, T.D.R). A.N. received pilot grant support from  
493 the UAB AMC21 Immunology Autoimmunity and Transplantation Strategic Initiative as well as  
494 funding from the UAB CCTS (UL1 TR001417) to support this work. NIH P30 AR048311 and  
495 P30 AI027767 provided support for the UAB Consolidated Flow Cytometry Core. The authors  
496 have no known conflicts of interest to disclose.

497 **Materials and Methods:**

498 Human Subjects and Samples. The UAB Institutional Review Board approved all study  
499 protocols for influenza vaccinated subjects. All subjects gave written informed consent as part of  
500 participation prior to providing peripheral blood for analysis. Influenza vaccinated patients self-  
501 identified as healthy and were recruited through the Alabama Vaccine Research Clinic (AVRC).  
502 Subjects received either the 2015-2016 Fluzone (Sanofi-Pasteur), 2015-2016 FluMist  
503 (AstraZeneca) the 2016-2017 Fluvirin (Seqirus), the 2017-2018 Fluzone (Sanofi-Pasteur) and  
504 the 2018-2019 Fluzone (Sanofi-Pasteur). Blood was drawn on days 0, 7, 14, 21, 28 and 120  
505 days +/- 1 week.

506 Lymphocyte and plasma isolation. Peripheral blood from human subjects was drawn into K2-  
507 EDTA tubes (BD Bioscience). Peripheral blood mononuclear cells (PBMCs) and plasma were  
508 isolated by density gradient centrifugation over Lymphocyte Separation Medium (CellGro). Red  
509 blood cells were lysed with ammonium chloride solution (StemCell). Plasma and PBMCs were  
510 either used immediately or aliquoted and stored in -80C freezers.

511 Human B cell purification. Total B cells were negatively selected from PBMCs by using EsaySep  
512 TM B cell enrichment kits (StemCell). Antigen-specific B cells were further sort-purified for  
513 sequencing experiments as outlined below.

514 Influenza Hemagglutinin Tetramer production and staining. The coding sequencing (encoding  
515 amino acids 18-524) of the hemagglutinin ectodomain were synthesized from the following  
516 influenza virus strains, A/California/VRDL7/2009, A/Switzerland/9715293/2013, A/Hong  
517 Kong/4801/204, and A/Michigan/45/2015, were synthesized (GeneArt, Regensburg, Germany)  
518 in frame with the human CD5 signal sequence located 5' to the HA coding region. Two  
519 mammalian expression constructs were made with a 6XHIS tag or an AviTag located 3' to the  
520 trimerization domain. HA-6X HIS and HA-AviTag were co-transfected in a 2:1 ration into  
521 FreeStyle TM 293-F Cells (ThermoFisher Scientific). Recombinant HA trimers with an average  
522 of 2 HIS6X monomers and 1AviTag monomer per trimer were purified from media by FPLC  
523 using a HisTrap HP column (GE Healthcare) for biotinylation *in vitro* using BirA biotin-protein  
524 ligase (Avidity). Tetramers of HA trimers were made by titrating in fluorochochrome-conjugated  
525 streptavidin to biotinylated HA trimers until the volumetric ratio for saturation was reached. To  
526 detect HA-binding B cells, cells were treated at 37C with 0.5U/ml neuraminidase (C.  
527 perfringens, Sigma) to remove sialic acid, and then were washed, blocked and stained with HA  
528 tetramers.

529 Hemagglutinin ELISAs. Recombinantly generated hemagglutinin proteins (see above) were  
530 coated onto EIA/RIA ELISA plates (Costar) at 1:500 to 1:1000 dilution. Plasma from vaccinated  
531 samples were serially diluted onto these coated plates. HA-specific IgG antibodies from vaccine  
532 samples were detected using peroxidase-conjugated anti-human IgG secondary antibodies  
533 (Jackson ImmunoResearch) and were developed using ABTS development with acid stop.  
534 Absorbance was measured at 415nm using a SpectraMaxM2 (Molecular Devices).

535 Flow Cytometry: Single cell suspensions were blocked with 2% human serum before cell  
536 surface staining. Antibodies used to stain lymphocytes are listed in [Supplemental File 2](#). 7AAD  
537 or LIVE/DEAD Fixable Dead Cell Stain Kits (Molecular Probes/ThermoFisher) were used to  
538 discriminate live cells. Intracellular staining was performed after staining with antibodies specific  
539 for cell surface markers. Cells were then fixed with formalin solution (neutral buffered, 10%;  
540 Sigma) and permeabilized with 0.1% IGEPAL (Sigma) in the presence of antibodies or  
541 fluorochrome labeled HA tetramers. Stained cells were analyzed using a FACSCanto II (BD  
542 Bioscience) or the Attune NxT flow cytometer (Invitrogen, ThermoFisher). Cells were sort-  
543 purified with a FACSaria (BD Biosciences) or Melody (BD Biosciences) in the UAB  
544 Comprehensive Flow Cytometry Core. FlowJo v9.9.3 or FlowJo v10.2 were used to perform  
545 analysis.

546 RNA-seq library preparation and analysis: RNA was isolated from HA-specific Bmem as well as  
547 ASCs and Naïve B cell by flow sorting these populations directly into RLT buffer (Qiagen) and  
548 snap freezing in liquid nitrogen. RNA was extracted using the QuickRNA Micro Prep Kit (Zymo).  
549 All resulting RNA from six biological replicates per B cell subset at the day 7 timepoint and four  
550 biological replicates per B cell subset at the day 14 timepoint was used as input for the SMART-  
551 seq v4 cDNA synthesis kit (Takara). Final libraries were constructed using 200 pg cDNA as  
552 input for the NexteraXT kit (Illumina) and quality assessed on a bioanalyzer. Libraries were  
553 pooled and sequenced using 50 bp paired-end chemistry on a HiSeq2500. Sequencing reads  
554 were mapped to the hg38 version of the human genome using STAR with the default settings  
555 and the UCSC KnownGene table as a reference transcriptome. Reads overlapping exons were  
556 tabulated using the GenomicRanges package in R/Bioconductor. Genes expressed at 3 reads  
557 per million or more in all samples from one group were considered detected and used as input  
558 for edgeR to identify differentially expressed genes. P-values were false-discovery rate (FDR)  
559 corrected using the Benjamin-Hochberg method with genes of an FDR <0.05 considered  
560 significant. Expression data was normalized to reads per kilobase per million mapped reads  
561 (RPKM).

562 GSEA analyses. Gene set enrichment analysis were submitted to the GSEA program  
563 (<http://software.broadinstitute.org/gsea/index.jsp>). Detected genes were ranked by multiplying  
564 the  $-\log_{10}$  of the P-value from edgeR by the sign of the fold change for use as input in the  
565 GSEA PreRanked analysis.

566 Ingenuity Pathway Analysis (IPA). IPA upstream regulator analysis (Qiagen Redwood City CA)  
567 was performed using the  $\log_2$  fold change in gene expression between genes that were  
568 significantly differentially expressed as defined by corrected FDR of  $P < 0.05$ , between T-  
569  $\text{bet}^{\text{hi}}/\text{FcRL5}^{\text{hi}}$  HA-specific Bmem over T- $\text{bet}^{\text{lo}}/\text{FcRL5}^{\text{lo}}$  HA-specific Bmem. Upstream regulators  
570 with an activation z-score of  $>2$  or  $<-2$  were considered to activated or inhibited. Fischer's  
571 exact test of  $p < 1 \times 10^{-6}$  was used to determine significant overlap between a regulator's  
572 downstream targets and our gene list.

573 ATAC-seq preparation and analysis. ATAC-seq was performed on HA-specific Bmem as  
574 follows. Cells were re-suspended in 25 ul of tagmentation reaction buffer (2.5 ul Tn5,  
575 1xTagment DNA Buffer, 0.02% Digitonin, 0.01% Tween-20) and incubated for 1hr at 37C. Cells  
576 were then lysed with 25 ul 2x Lysis Buffer (composed of 300 mM NaCl, 100 mL EDTA, 0.6%  
577 SDS, 1.6 ug Proteinase-K) for 30 min at 40C, low molecular weight DNA purified by size-  
578 selection with SPRI-beads (Agencourt), and PCR amplified using Nextera primers with 2x HiFi  
579 Polymerase Master Mix (KAPA Biosystems). Amplified, low molecular weight DNA was isolated  
580 using another SPRI-bead size selection. Quality control was performed on a bioanalyzer.  
581 Libraries were sequenced using a 50bp paired end run at the UAB Heflin Genomics Center.  
582 Raw sequencing reads were mapped to the hg38 version of the human genome using Bowtie  
583 (Langmead et al 2009) with the default settings. Duplicate reads were annotated using the  
584 Picard Tools MarkDuplicates function (<http://broadinstitute.github.io/picard/>) and eliminated from  
585 downstream analysis. Enriched peaks were identified using MACS2 with the default settings.  
586 Genomic and motif annotations were computer for ATAC-seq peaks using the HOMER<sup>104</sup>  
587 annotatePeaks.pl script. Read counts for all peaks were annotated for each sample from the  
588 bam file using the GenomicRanges<sup>105</sup> R/Bioconductor package and normalized to reads per  
589 peak per million (rppm).<sup>106</sup>

590 Illumina MiSeq: HA-specific Bmem and plasmablasts were sort-purified into RLT buffer and  
591 snap frozen in liquid nitrogen. RNA was extracted using the quick start protocol from QIAGEN  
592 RNeasy Mini Kit. First strain cDNA synthesis was performed using iScript cDNA synthesis kit  
593 (BioRad) and 8ul of RNA following manufacturer protocol. First round amplification of IgG, IgA,  
594 and IgM was performed in a 25 ul reaction volume using 4-8 ul cDNA, Platinum PCR SuperMix

595 High Fidelity (Invitrogen), and 1ul gene specific primers (120 nM) of Vn1-Vh7 FR1 (forward) and  
596 Ca, Cu, Cg (reverse). First round PCR conditions were: 95C for 3 min, 42 cycles of 30s 95C,  
597 30s 58C, 30s 72C, and 72C for 3 minutes. Amplification was verified using 1.2% agarose gels  
598 (Lonza). Samples were ligated in a second round PCR with Nextera Index kit (Illumina). PCR2  
599 conditions for indexing were: 72C for 3 minutes, 98C for 30s and 5 cycles of 98C for 10s, 63C  
600 for 30s, and 72 C for 3 minutes. Products were purified with Agencourt AMPure XP beads  
601 (Beckman) and nanodropped for final concentration before pooling into a final library. Library  
602 was denatured using 0.2N NaOH and quenched with cold HT1 per manufacturer (Illumina)  
603 instruction. Denatured libraries were diluted with 20% PhiX (Illumina) as an internal quality  
604 control and loaded onto a 600-cycle V3 MiSEQ cartridge (Illumina) for amplification.

605 Clonotype Assembly and Analysis. Raw sequence reads were processed using a combination  
606 of in-house and public analytic tools. Full methodology for this data processing has been  
607 described elsewhere.<sup>107</sup> Pair-end reads were joined and filtered based on sequence length and  
608 quality thresholds. Alignment was performed using IMGT/Hi-Vquest, sequences and analyzed  
609 for clonality and for mutations in the V region by a custom program written by the authors (AFR,  
610 CF) in perl and Matlab that is available on request. Frequency and distribution of somatic  
611 hypermutation was determined on the basis of non-gap mismatches of expressed sequences  
612 with closest germline Vh sequence. For visualization, alluvial plots and lineage accumulation  
613 curves were constructed in Matlab. Detailed clonotype analysis is presented in [Supplemental](#)  
614 [File 2](#).

#### 615 BCR Cloning/Recombinant Antibody Screening

616 Antigen binding B cells were index sorted by Fcrl5 expression status as single cells into  
617 hypotonic lysis buffer in 384 well plates i and stored at -80deg. Lysates were used to generate  
618 cDNA using the High-capacity cDNA generation kit (Roche) following manufactures instructions.  
619 PCR was performed using primers specific for nucleotides encoding the amino terminus of the  
620 mature IGHV, IGKV, and IGLV proteins. The resulting amplicons were inserted into a  
621 mammalian expression plasmid containing the IGG1, IGKC, or IGLC gene sequence. To  
622 generate recombinant antibody, plasmids encoding Ig heavy light chain pairs were co-  
623 transfected into 293FreeStyle cells (Invitrogen) using standard Polyethylenimine transfection  
624 methods. Supernatant was assayed for recombinant antibody expression and for antigen  
625 specificity using the flow cytometric bead array (Spherotech). conjugated to IgG or to  
626 recombinant hemagglutinin antigen as has been described elsewhere (PLOS ONE, [Kelsoe](#)).<sup>76</sup>

627

628 Statistical Analysis. Detailed statistical analytic details are presented in [Supplemental File 2](#).

629 Analysis was performed using GraphPad Prism version 7.0a.

630 [Supplemental File 1](#). Supplemental Figures 1-3 as outlined in **Figure Legends**.

631 [Supplemental File 2](#). Detailed statistical and clonotype type data.

632 [Supplemental File 3](#). Full RNA-seq, ATAC-seq, and PAGERANK network analysis for the data  
633 presented in **Figures 2, 3**, and **Supplemental Figure 2**.

### 634 **Figure Legends**

635  
636 **Figure 1. IIV elicits two phenotypically and kinetically distinct hemagglutinin (HA)-specific**  
637 **memory B cell (Bmem) subsets that have no correlation to each other or to the early**  
638 **plasmablast (PB) response.**

639  
640 **(A)** Representative flow panel depicting CD19<sup>pos</sup> IgD<sup>neg</sup> B cells from the peripheral mononuclear  
641 blood cells (PBMCs) of one subject 7 days after IIV classified into 4 subsets according to  
642 expression of H1-tetramer and Ki-67. Accompanying histograms demonstrate differences in Ki-  
643 67, CD38, T-bet, H1-tetramer expression as well as side scatter (SSC-A) parameters in these 4  
644 subsets.

645 **(B)** Geometric mean fluorescence intensity (gMFI) of Ki-67 stain in HA-specific T-bet<sup>hi</sup> (red) and  
646 HA-specific T-bet<sup>lo</sup> Bmem (blue) in 8 subjects at weekly time points after IIV

647 **(C-J)** Nineteen healthy subjects received the 2015 IIV that included the California-H1 (Ca-H1)  
648 and Switzerland-H3 (Sw-H3) vaccine antigens.

649 **(C-F)** Frequencies of circulating T-bet<sup>hi</sup> (red) and T-bet<sup>lo</sup> (blue) Ca-H1 or Sw-H3 Bmem subsets  
650 were assessed at weekly time points one month after vaccine. Populations are represented as  
651 percent of parent non-plasma cell gate (CD19<sup>pos</sup> IgD<sup>neg</sup> CD38<sup>med/lo</sup>, NPCs). Gating strategy to  
652 identify NPCs is depicted in [Supplemental Fig 1](#).

653 **(G-H)** Correlation between fold change in plasmablasts (CD27<sup>pos</sup> CD38<sup>hi</sup> or PB) between days 0  
654 and 7 and the frequency of circulating T-bet<sup>hi</sup> (red) and T-bet<sup>lo</sup> (blue) California H1 (Ca-H1) or  
655 Switzerland H3 (Sw-H3) Bmem expressed as a percent of the parent non-plasma cell (NPC)  
656 compartment. Gating strategy to identify PBs is shown in [Supplemental Figure 1](#).

657 **(I-J)** Correlation between the circulating day 7 Ca-H1 and Sw-H3-specific T-bet<sup>hi</sup> and T-bet<sup>lo</sup>  
658 Bmem response from 19 subjects given the 2015 IIV. HA-specific Bmem response is expressed  
659 as a percent of the parent NPC gate.

660

661 Statistical analyses were performed with one way ANOVA testing (B), Wilcoxon rank sum  
662 testing (C-F), and Spearman correlation coefficient (G-J), paired Student's t-test. \* $p < 0.05$ , \*\*,  
663  $p < 0.01$ , \*\*\*  $p < 0.001$ , \*\*\*\*  $p < 0.0001$  ns= non-significant  
664

665 **Figure 2. FcrL5<sup>hi</sup> HA-specific Bmem have T-bet dependent programming and an effector**  
666 **memory profile.**

667  
668 **(A-B)** Circulating plasmablasts (PB, green), naïve B cells (brown, CD19<sup>pos</sup> CD27<sup>neg</sup> IgD<sup>pos</sup>,  
669 gating strategy in [Supplemental Figure 1](#)), and Ca-H1<sup>pos</sup> Bmem classified by FcrL5 expression  
670 (T-bet/FcrL5<sup>hi</sup>, red; T-bet/FcrL5<sup>lo</sup>, blue) were sort-purified from (6) subjects at day 7 after 2017 IIV  
671 for comparative transcriptional analysis via RNA-seq. Principal component analysis of these  
672 populations is shown in **(A)**.

673 Reads per Kilobase per Million (RPKM) for target genes of interest by sorted population is  
674 shown in **(B)** with significance of gene expression differences between day 7 Ca-H1<sup>pos</sup> T-bet<sup>hi</sup>  
675 over day 7 Ca-H1<sup>pos</sup> T-bet<sup>lo</sup> Bmem indicated. Significance of target gene expression differences  
676 between other depicted populations is provided in the [Supplemental File 2](#).

677 **(C)** Heat maps of gene expression in various subsets (I: naïve, II: PB, III: D7 Ca-H1<sup>pos</sup> T-bet<sup>hi</sup>  
678 Bmem, IV: D7 Ca-H1<sup>pos</sup> T-bet<sup>lo</sup> Bmem) curated by function as related to cell cycle and apoptosis  
679 (Qiagen RT2 profiler). Differentially expressed genes (DEGs) between populations are  
680 represented as dots with colors of dots indicating the identity of comparator subsets.

681 **(D)** Gene set enrichment analysis (GSEA) comparing the transcriptome profile of day 7 Ca-H1<sup>pos</sup>  
682 T-bet<sup>hi</sup> over day 7 Ca-H1<sup>pos</sup> T-bet<sup>lo</sup> Bmem to published gene sets of effector memory T cells over  
683 central memory T cells.<sup>48</sup> Data is reported as enrichment score (ES) plotted against ranked  
684 gene list (n = 10992 genes) of day 7 Ca-H1<sup>pos</sup> T-bet<sup>hi</sup> over day 7 Ca-H1<sup>pos</sup> T-bet<sup>lo</sup> Bmem with the  
685 dotted line indicating the leading edge of genes and the purple triangle demarcating the change  
686 in gene expression polarity. Normalized enrichment score (NES) and p value are also reported.

687 **(E-F)** Circulating PB (green, n=5), D7 H1<sup>pos</sup> T-bet<sup>hi</sup> Bmem (red, n=2), D7 H1<sup>pos</sup> T-bet<sup>lo</sup> Bmem  
688 (blue, n=5), and D7 H1<sup>neg</sup> T-bet<sup>hi</sup> Bmem (pink, n=3) were sort-purified from healthy subjects after  
689 2018 IIV for analysis of chromatin accessibility by ATAC-seq. FcrL5 was used as a cell surface  
690 surrogate for T-bet expression ([see Supplemental Fig 2](#)). Principal component analysis of  
691 ATAC-seq data with relevant populations indicated by color and label is shown in **(E)**. **(F)**  
692 Defined as Reads per Peak per Million (RPPM), accessibility at genes known to function as  
693 target genes of IRF4 in human plasma cells<sup>51</sup> was assessed in each population sorted for  
694 ATAC-seq as shown in [Figure 2E](#).

695 **(G)** Transcription factors (TFs) that regulate the D7 H1<sup>pos</sup> T-bet<sup>hi</sup> Bmem network over D7 H1<sup>pos</sup>  
696 T-bet<sup>lo</sup> Bmem network were identified using PageRank (PR) analysis. PR log fold change (FC)  
697 versus differential gene expression (DEG) by RNA-seq analysis of these TFs is depicted.

698



699 Statistical analysis was performed using two-way ANOVA (B) and multiple t-test testing (F). \*p<  
700 0.05, \*\*, p<0.01, \*\*\* p<0.001, \*\*\*\* p <0.0001 ns= non-significant  
701  
702  
703  
704

705 **Figure 3. T-bet<sup>hi</sup> HA-specific Bmem accommodate the production of Intermediate**  
706 **quantities of intracellular flu-specific immunoglobulin (Ig).**

707

708 **(A-C)** A healthy individual received the 2018 IIV and had PBMCs harvested at day 7 after  
709 vaccination for staining of B cells with H1 tetramer extracellularly and intracellularly. B cells were  
710 then visualized using ImageStream. Images of three candidate cells are shown with relevant  
711 fluorochrome labeled targets depicted **(A)**. Intensity of H1 tetramer extracellular **(B)** and  
712 intracellular **(C)** stain as calculated by IDEAS software for individual T-bet<sup>hi</sup>, T-bet<sup>lo</sup> or CD38<sup>hi</sup> B  
713 cells.

714 **(D)** Heat map of gene expression in various subsets (I: naïve, II: PB, III: D7 H1<sup>pos</sup> T-bet<sup>hi</sup>  
715 Bmem, IV: D7 H1<sup>pos</sup> T-bet<sup>lo</sup> Bmem) curated by function as related to the unfold protein  
716 response (Qiagen RT2 profiler). Differentially expressed genes (DEGs) between populations  
717 are represented as dots with colors of dots indicating the identity of comparator subsets.

718 **(E)** Using PageRank (PR) analysis, transcription factors (TFs) that regulate the D7 H1<sup>pos</sup> T-bet<sup>hi</sup>  
719 Bmem network over D7 PB network were identified and shown as PR log fold change plotted  
720 against DEGs from RNA-seq data set (see Figure 2).

721 **(F)** GSEA comparing the transcriptome profile of day 7 Ca-H1<sup>pos</sup> T-bet<sup>hi</sup> over day 7 Ca-H1<sup>pos</sup> T-  
722 bet<sup>lo</sup> Bmem against Gene Ontology terms was performed. Network analysis on the output  
723 identified 3 clusters of gene ontology terms grouped by shared leading edge genes.  
724 Representative GSEA plots from each of these clusters, labeled 1-3, is shown.

725 **(G)** Ingenuity pathway analysis (IPA) was performed on the genes that comprised clusters 2.  
726 Predicted upstream regulators of cluster 2 are shown in a bar plot with bar color indicating z-  
727 score. Regulators that are predicted with bias are demarcated with a dot above that regulator.

728 **(H)** Genome plot of chromatin accessibility for the *XBP1* locus is shown in D7 PB, D7 H1<sup>pos</sup> T-  
729 bet<sup>hi</sup> Bmem, D7 H1<sup>pos</sup> T-bet<sup>lo</sup> Bmem aligned with previously published T-bet binding sites as  
730 assessed by CHiP-seq.<sup>10</sup> Data is reported as RPPM.

731

732

733 Statistical analysis was performed using one-way ANOVA testing (B, C). \*p< 0.05, \*\*, p<0.01,

734 \*\*\* p<0.001, \*\*\*\* p<0.0001 ns= non-significant

735

736

737 **Figure 4. T-bet<sup>hi</sup> HA-specific Bmem clonotypes exclusively persist in circulation after IIV.**

738

739 Three individuals (Donors 1-3) were given the 2016 IIV and had PBMCs collected at serial time  
740 points within one month of vaccination for assessment of the heavy chain repertoire ( $V_h$  families  
741 1-7) of flu-specific subsets using next generation sequencing. Data from Donors 1 and 2 are  
742 shown here. Data from donor 3 is shown in [Supplemental Figure 3](#). The cumulative percentage  
743 of sequences (Y-axis) versus lineage (clonal) size (X-axis) ranked by lineage size is shown in  
744 **(A)**.

745 **(B)** Relationship between the day 7  $H3^{pos}$  T-bet<sup>hi</sup> Bmem and the day 7  $H3^{pos}$  T-bet<sup>lo</sup> Bmem  $V_h$   
746 repertoire is shown as an alluvial plot for donor 1 and 2. Cumulative percentage of sequences  
747 are ordered into lineages and ribbons connect lineages that have 85% CDR3 similarity between  
748 the two populations.

749 **(C-F)** Alluvial plots and accumulation curves depict connectivity of clonotypes in donor 1 over  
750 time after IIV. Corresponding summary table depicting percent of shared lineages between  
751 Bmem over time is shown in the [Supplementary File 2](#). Connectivity between D7  $H3^{pos}$  T-bet<sup>lo</sup>  
752 Bmem and D7  $H3^{pos}$  T-bet<sup>hi</sup> clonotypes and D14  $H3^{pos}$  T-bet<sup>lo</sup> Bmem clonotypes **(C)** or D14  
753  $H3^{pos}$  T-bet<sup>hi</sup> Bmem clonotypes **(D)** is shown. Connectivity is defined according to 85% CDR3  
754 sequence similarity. Red-yellow ribbons correspond to clones shared across 3 populations.  
755 Green-blue ribbons correspond to clones shared across 2 populations. Only those lineages that  
756 have connectivity with day 14 clones are depicted here. **(E-F)** Lineages of day 14  $H3^{pos}$  Bmem  
757 populations are rank ordered by descending size and the percent of day 7  $H3^{pos}$  Bmem lineages  
758 that are shared by rank ordered day 14 clonotype is plotted. Day 7  $H3^{pos}$  Bmem lineages are  
759 divided as total T-bet<sup>hi</sup> clones (solid red line), T-bet<sup>hi</sup> exclusive clones (dotted red line), total T-  
760 bet<sup>lo</sup> clones (solid blue line), T-bet<sup>lo</sup> exclusive clones (dotted blue line).

761 **(G)** Three donors (donor 1, donor 3, donor 4) received 2017 IIV with single cell sort-purification  
762 of Ca-H1<sup>pos</sup> T-bet<sup>hi</sup> Bmem and Ca-H1<sup>pos</sup> T-bet<sup>lo</sup> Bmem within 7-14 days of vaccine for  
763 recombinant monoclonal antibody (rMAb) generation. Luminex diagram shows reactivity of  
764 these rMAbs to various H1 antigens, Michigan 15 (Mi15), California07 (Ca7), Puerto Rico/8  
765 (PR8). Clones with high PR8 reactivity (gMFI >4000) are colorized by T-bet expression status  
766 and shown on CA7 and MI15 Luminex diagrams.

767

768 Statistical analysis was done with Student's t-test and post-testing for cumulative distribution.

769 **(G)**. \* $p < 0.05$ , \*\* $p < 0.01$ , \*\*\* $p < 0.001$ , \*\*\*\* $p < 0.0001$  ns= non-significant

770



772 **Figure 5. T-bet<sup>hi</sup> HA-specific Bmem correlate with long-lived Ab after IIV with clones that**  
773 **are preferentially recalled into the PB repertoire upon antigen re-challenge.**

774

775 **(A-D)** Correlation between fold change in HA-IgG (day 0 to day 120) and the magnitude of the  
776 day 7 HA<sup>pos</sup> T-bet<sup>hi</sup> and day 7 HA<sup>pos</sup> T-bet<sup>lo</sup> Bmem response (expressed as percent of total  
777 NPCs) in 19 healthy individuals who received the 2015 IIV. The 2015 IIV included the California  
778 H1 (Ca-H1) and Switzerland H3 (Sw-H3) antigens. Correlations between HA antigen-specific  
779 populations and corresponding HA titer is shown. Other relevant correlations are shown in  
780 [Supplemental Figure 1](#).

781 **(E-K)** Ten individuals under study received serial IIV and had the HA-specific B cell subset  
782 assessed by flow cytometry. Three of these individuals (donor 1, 2, and 3) were examined using  
783 next-generation sequencing for repertoire analysis in both vaccine years. Data from donor 3 is  
784 shown in [Supplemental Figure 3](#).

785 **(E)** Pre-vaccine HA-IgG titer in subjects under study who received the IIV in sequential vaccine  
786 seasons.

787 **(F)** Dot plot shows the magnitude by year of the total, T-bet<sup>hi</sup> and T-bet<sup>lo</sup> D7 HA-specific Bmem  
788 population expressed as a percent of the NPC gate in 10 individuals given sequential IIV.

789 **(G)** Representative FACS plot from a single individual vaccinated in 2015 and 2016 showing the  
790 frequency of the H1 population by T-bet expression within 7 days of IIV. The H1 vaccine antigen  
791 was conserved between the 2015 and 2016 IIV.

792 **(H)** Representative FACS plot from a single individual vaccinated in 2016 and 2017 showing the  
793 frequency of the H3 population by T-bet expression within 7 days of IIV. The H3 vaccine antigen  
794 was conserved between the 2016 and 2017 IIV.

795 **(I-J)** Lineages of D7 2017 PBs (thick green line) were rank ordered by descending size and the  
796 percent of day 7 2016 Bmem and 2016 PB lineages (thin green line) that are shared with these  
797 rank ordered day 7 2017 PB clonotypes is plotted. 2016 D7 H3<sup>pos</sup> Bmem lineages are divided as  
798 total T-bet<sup>hi</sup> clones (solid red line), T-bet<sup>hi</sup> exclusive clones (dotted red line), total T-bet<sup>lo</sup> clones  
799 (solid blue line), T-bet<sup>lo</sup> exclusive clones (dotted blue line). Corresponding summary table  
800 depicting percent of shared lineages between Bmem and PB subsets over time is shown in the  
801 [Supplementary File 2](#).

802 **(K)** Alluvial plot depicts the clonal relatedness of 2017 D7 PB clones to those from the 2016 D7  
803 H3 T-bet<sup>hi</sup> and H3 T-bet<sup>lo</sup> Bmem subsets from Donor 2. Brown ribbons correspond to clones  
804 shared across 3 populations. Green-blue ribbons correspond to clones shared across 2

805 populations. Only those lineages that have connectivity with 2017 D7 PB clones are depicted  
806 here.

807 **(L)** Candidate model. Abbreviations for long-lived antibody-secreting cells (LL-ASCs), effector  
808 Bmem ( $B_{EM}$ ) and central Bmem ( $B_{CM}$ ) are used.

809  
810 Statistical analyses were performed with Spearman correlations **(A-D)**, Student's t-test **(E)** and  
811 one-way ANOVA (Friedman test) **(F)**. \* $p < 0.05$ , \*\*,  $p < 0.01$ , \*\*\*  $p < 0.001$ , \*\*\*\*  $p < 0.0001$  ns= non-  
812 significant

813

814

815 **Supplemental Figure 1.**

816

817 **(A-C)** Gating strategy that defines the IgD<sup>neg</sup>, non-plasma cell (NPC) CD38<sup>hi</sup> and naïve B cell  
818 **(A)**, plasmablast, PB **(B)**, and circulating Tfh (cTfh) **(C)** populations. Among 19 subjects who  
819 received the 2015 IIV, the magnitude of the PB response expressed as percent live CD19<sup>+</sup> B  
820 cells between day 0 to day 7 after IIV **(B)** and the cTfh response expressed as percent live CD4  
821 T cells between day 0 and day 7 **(C)** is also depicted.

822 **(D)** FACS plots depict phenotyping of H1<sup>pos</sup> T-bet<sup>hi</sup> (red), H1<sup>pos</sup> T-bet<sup>lo</sup> (blue), non-H1<sup>pos</sup> T-bet<sup>lo</sup>  
823 (gray), and non H1<sup>pos</sup> T-bet<sup>hi</sup> (pink) populations according to CD27, CD11c, Fcrl5, CXCR5 and  
824 CD21 expression.

825 **(E)** ImageStream analysis of B cells within 7 days of IIV. Representative Brightfield images of 15  
826 CD38<sup>hi</sup>, H1<sup>pos</sup> T-bet<sup>hi</sup> Bmem, and H1<sup>pos</sup> T-bet<sup>lo</sup> Bmem are depicted.

827 **(F-S)** These data refer to correlations between various subsets among 19 healthy subjects who  
828 received the 2015 IIV that included the California H1 (Ca-H1) and Switzerland (Sw-H3)  
829 antigens.

830 **(F-I)** Correlations between the fold change in cTfh from day 0 to day 7 after IIV with percent day  
831 7 antigen specific (Ca-H1 or Sw-H3) T-bet<sup>hi</sup> and T-bet<sup>lo</sup> Bmem out of the total NPC gate.

832 **(J-K)** Correlation between fold change in H1 and H3 IgG titer from day 0 to day 120 after IIV  
833 and the fold change in the day 7 PB and cTfh response expressed as percent from live CD19<sup>+</sup> B  
834 and CD4<sup>+</sup> T cells respectively.

835 **(L)** Correlation between fold change in H3 IgG titer from day 0 to day 120 after IIV and the  
836 percent day 7 Ca-H1<sup>pos</sup> T-bet<sup>hi</sup> Bmem subset from the parent NPC gate.

837 **(M)** Correlation between the fold change in H1 IgG titer from day 0 to day 120 after IIV and the  
838 percent day 7 Sw-H3 T-bet<sup>hi</sup> Bmem subset from the parent NPC gate.

839 **(N)** Correlation between the fold change in H1 titer from day 0 to day 120 after IIV and the  
840 percent day 14 Ca-H1<sup>pos</sup> T-bet<sup>hi</sup> Bmem subset from the parent NPC gate.

841 **(O)** Correlation between the fold change in H3 titer from day 0 to day 120 after IIV and the  
842 percent day 14 Ca-H1<sup>pos</sup> T-bet<sup>hi</sup> Bmem subset from the parent NPC gate.

843 **(P)** Correlation between the fold change in H1 titer from day 0 to day 120 after IIV and the  
844 percent D14 Ca-H1 T-bet<sup>lo</sup> Bmem subset from the parent NPC gate.

845 **(Q)** Correlation between the fold change in H3 IgG from day 0 to day 120 and the percent day  
846 14 Sw-H3 T-bet<sup>hi</sup> Bmem subset from the parent NPC gate.

847 **(R)** Correlation between the fold change in H1 IgG from day 0 to day 120 and the percent day  
848 14 Sw-H3 T-bet<sup>hi</sup> Bmem subset from the parent NPC gate.

849 **(S)** Correlation between the fold change in H3 IgG from day 0 to day 120 and the day 14 Sw-H3  
850 T-bet<sup>lo</sup> Bmem subset from the parent NPC gate.

851

852 Statistical analysis was done with Student's t-test (B, C) and Spearman correlation (F-S). \*p<

853 0.05, \*\*, p<0.01, \*\*\* p<0.001, \*\*\*\* p <0.0001 ns= non-significant

854



855 **Supplemental Figure 2**

856

857 **(A)** Comparison of DEGs (defined as log 2FC,  $q < 0.05$ ) between published CD21<sup>lo</sup> over CD21<sup>hi</sup>  
858 Bmem after IIV<sup>20</sup> and day 7 HA<sup>pos</sup> T-bet<sup>hi</sup> (Fcr15<sup>hi</sup>) over day 7 HA<sup>pos</sup> T-bet<sup>lo</sup> Fcr15<sup>lo</sup> Bmem studied  
859 here. Significant DEGs that are shared between gene lists and different between gene lists are  
860 distinguished by color. Target genes of interest are annotated.

861 **(B)** Gene set enrichment analysis (GSEA) comparing the transcriptome profile of day 7 H1<sup>pos</sup> T-  
862 bet<sup>hi</sup> over day 7 H1<sup>pos</sup> T-bet<sup>lo</sup> Bmem to additional published gene sets of effector memory T cells  
863 over central memory T cells.<sup>48-50</sup> Data is reported as enrichment score (ES) plotted against  
864 ranked gene list ( $n = 10992$  genes) of day 7 H1<sup>pos</sup> T-bet<sup>hi</sup> over day 7 H1<sup>pos</sup> T-bet<sup>lo</sup> Bmem with the  
865 dotted line indicating the leading edge of genes and the purple triangle demarcating the change  
866 in gene expression polarity. Normalized enrichment score (NES) and p value are also reported.

867 **(C)** Circulating plasmablasts (PB, green), naïve B cells (brown, CD19<sup>pos</sup> CD27<sup>neg</sup> IgD<sup>pos</sup>, gating  
868 strategy in [Supplemental Figure 1](#)), and H1<sup>pos</sup> Bmem classified by FcrL5 expression (T-  
869 bet/Fcr15<sup>hi</sup>, red; T-bet/Fcr15<sup>lo</sup>, blue) were sort-purified from (4) subjects at day 14 after 2017 IIV  
870 for comparative transcriptional analysis via RNA-seq. Principal component analysis of these  
871 data is shown.

872 **(D)** Circulating H1<sup>pos</sup> T-bet<sup>hi</sup> (N=4) Bmem, H1<sup>pos</sup> T-bet<sup>lo</sup> Bmem (N=4), and day 7 PB (N=5)  
873 were sort-purified for ATAC-seq using Fcr15 as a cell surface surrogate for T-bet expression .  
874 Principal component analysis of these data is show here.

875 **(E)** Defined as Reads per Peak per Million (RPPM), accessibility at genes known to function as  
876 target genes of IRF4 in human plasma cells<sup>51</sup> was assessed in each population sorted for  
877 ATAC-seq as shown in [Supplemental Figure 2D](#).

878 **(F-H)** Live CD19<sup>+</sup> B cells were purified in one subject within 7 days of IIV for ImageStream  
879 resolution of the H1<sup>pos</sup> Bmem compartment by T-bet expression. FLOCK analysis of  
880 Imagestream data is shown as heat map with cluster size indicated by an accompanying bar  
881 plot. Five target clusters of interest were identified and colorized (green, pink, magenta, red,  
882 blue). Expression of intracellular and extracellular tetramer stain of these 5 target clusters  
883 shown by dot plot **(G-H)**.

884 **(I)** Genome plot of chromatin accessibility for the *XBP1* locus is shown in D7 PB, D14 H1<sup>pos</sup> T-  
885 bet<sup>hi</sup> Bmem, D14 H1<sup>pos</sup> T-bet<sup>lo</sup> Bmem aligned with previously published T-bet binding sites as  
886 assessed by ChiP-seq.<sup>10</sup> Data is reported as RPPM.

887

888 **Supplemental Figure 3**

889

890 **(A)** Alluvial plots depict connectivity of clonotypes in donor 3 over time after IIV. Connectivity  
891 between D14 Ca-H1 T-bet<sup>lo</sup> Bmem and D7 Ca-H1 Fcrl5<sup>hi</sup> clonotypes and D14 HK-H3pos T-bet<sup>lo</sup>  
892 Bmem clonotypes or D14 HK-H3 Fcrl5<sup>hi</sup> Bmem clonotypes is shown. Connectivity is defined  
893 according to 85% CDR3 sequence similarity. Red-yellow ribbons correspond to clones shared  
894 across 3 populations. Green-blue ribbons correspond to clones shared across 2 populations.  
895 Only those lineages that have connectivity with day 14 clones are depicted here. **(B-C)**  
896 Lineages of day 28 H1<sup>pos</sup> Bmem populations were rank ordered by descending size and the  
897 percent of day 14 H1<sup>pos</sup> T-bet<sup>hi</sup> **(B)** or day 14 H1<sup>pos</sup> T-bet<sup>lo</sup> **(C)** Bmem lineages that are shared  
898 by rank ordered D28 clonotype is plotted. Day 14 H3<sup>pos</sup> Bmem lineages are divided as total T-  
899 bet<sup>hi</sup> clones (solid red line), T-bet<sup>hi</sup> exclusive clones (dotted red line), total T-bet<sup>lo</sup> clones (solid  
900 blue line), T-bet<sup>lo</sup> exclusive clones (dotted blue line). Corresponding summary table depicting  
901 percent of shared lineages between Bmem over time is shown in the [Supplementary File 2](#).

902 **(D)** Lineages of D7 2017 PBs were rank ordered by descending size and the percent of D14  
903 2016 Bmem and 2016 PB lineages that are shared with these rank ordered D7 2017 PB  
904 clonotypes are plotted. Day 14 H3<sup>pos</sup> Bmem lineages are divided as total T-bet<sup>hi</sup> clones (solid  
905 red line), T-bet<sup>hi</sup> exclusive clones (dotted red line), total T-bet<sup>lo</sup> clones (solid blue line), T-bet<sup>lo</sup>  
906 exclusive clones (dotted blue line). Corresponding summary table depicting percent of shared  
907 lineages between Bmem and PB subsets over time is shown in the [Supplementary File 2](#).

908

909 **References:**

- 910 1. Chiu C, Ellebedy AH, Wrammert J, Ahmed R. B cell responses to influenza infection and  
911 vaccination. *Curr Top Microbiol Immunol*. 2015;386:381-398.
- 912 2. Guthmiller JJ, Wilson PC. Harnessing immune history to combat influenza viruses. *Curr*  
913 *Opin Immunol*. 2018;53:187-195.
- 914 3. Tangye SG, Liu YJ, Aversa G, Phillips JH, de Vries JE. Identification of functional human  
915 splenic memory B cells by expression of CD148 and CD27. *J Exp Med*.  
916 1998;188(9):1691-1703.
- 917 4. Klein U, Rajewsky K, Kuppers R. Human immunoglobulin (Ig)M+IgD+ peripheral blood B  
918 cells expressing the CD27 cell surface antigen carry somatically mutated variable region  
919 genes: CD27 as a general marker for somatically mutated (memory) B cells. *J Exp Med*.  
920 1998;188(9):1679-1689.
- 921 5. Maurer D, Fischer GF, Fae I, et al. IgM and IgG but not cytokine secretion is restricted to  
922 the CD27+ B lymphocyte subset. *J Immunol*. 1992;148(12):3700-3705.
- 923 6. Agematsu K, Nagumo H, Yang FC, et al. B cell subpopulations separated by CD27 and  
924 crucial collaboration of CD27+ B cells and helper T cells in immunoglobulin production.  
925 *Eur J Immunol*. 1997;27(8):2073-2079.
- 926 7. Myles A, Sanz I, Cancro MP. T-bet(+) B cells: A common denominator in protective and  
927 autoreactive antibody responses? *Curr Opin Immunol*. 2019;57:40-45.
- 928 8. Stone SL, Peel JN, Scharer CD, et al. T-bet Transcription Factor Promotes Antibody-  
929 Secreting Cell Differentiation by Limiting the Inflammatory Effects of IFN-gamma on B  
930 Cells. *Immunity*. 2019.
- 931 9. Haga CL, Ehrhardt GR, Boohaker RJ, Davis RS, Cooper MD. Fc receptor-like 5 inhibits  
932 B cell activation via SHP-1 tyrosine phosphatase recruitment. *Proc Natl Acad Sci U S A*.  
933 2007;104(23):9770-9775.
- 934 10. Soderquest K, Hertweck A, Giambartolomei C, et al. Genetic variants alter T-bet binding  
935 and gene expression in mucosal inflammatory disease. *PLoS Genet*.  
936 2017;13(2):e1006587.
- 937 11. Morita R, Schmitt N, Bentebibel SE, et al. Human blood CXCR5(+)/CD4(+) T cells are  
938 counterparts of T follicular cells and contain specific subsets that differentially support  
939 antibody secretion. *Immunity*. 2011;34(1):108-121.
- 940 12. Herati RS, Reuter MA, Dolfi DV, et al. Circulating CXCR5+PD-1+ response predicts  
941 influenza vaccine antibody responses in young adults but not elderly adults. *J Immunol*.  
942 2014;193(7):3528-3537.
- 943 13. Wrammert J, Smith K, Miller J, et al. Rapid cloning of high-affinity human monoclonal  
944 antibodies against influenza virus. *Nature*. 2008;453(7195):667-671.
- 945 14. Lee FE, Halliley JL, Walsh EE, et al. Circulating human antibody-secreting cells during  
946 vaccinations and respiratory viral infections are characterized by high specificity and lack  
947 of bystander effect. *J Immunol*. 2011;186(9):5514-5521.
- 948 15. Wrammert J, Koutsonanos D, Li GM, et al. Broadly cross-reactive antibodies dominate  
949 the human B cell response against 2009 pandemic H1N1 influenza virus infection. *J Exp*  
950 *Med*. 2011;208(1):181-193.
- 951 16. Andrews SF, Huang Y, Kaur K, et al. Immune history profoundly affects broadly  
952 protective B cell responses to influenza. *Sci Transl Med*. 2015;7(316):316ra192.
- 953 17. Andrews SF, Kaur K, Pauli NT, Huang M, Huang Y, Wilson PC. High preexisting  
954 serological antibody levels correlate with diversification of the influenza vaccine  
955 response. *J Virol*. 2015;89(6):3308-3317.
- 956 18. Jackson KJ, Liu Y, Roskin KM, et al. Human responses to influenza vaccination show  
957 seroconversion signatures and convergent antibody rearrangements. *Cell Host Microbe*.  
958 2014;16(1):105-114.

- 959 19. Ellebedy AH, Jackson KJ, Kissick HT, et al. Defining antigen-specific plasmablast and  
960 memory B cell subsets in human blood after viral infection or vaccination. *Nat Immunol.*  
961 2016;17(10):1226-1234.
- 962 20. Lau D, Lan LY, Andrews SF, et al. Low CD21 expression defines a population of recent  
963 germinal center graduates primed for plasma cell differentiation. *Sci Immunol.* 2017;2(7).
- 964 21. Koutsakos M, Wheatley AK, Loh L, et al. Circulating TFH cells, serological memory, and  
965 tissue compartmentalization shape human influenza-specific B cell immunity. *Sci Transl*  
966 *Med.* 2018;10(428).
- 967 22. Allie SR, Bradley JE, Mudunuru U, et al. The establishment of resident memory B cells  
968 in the lung requires local antigen encounter. *Nat Immunol.* 2019;20(1):97-108.
- 969 23. Knox JJ, Buggert M, Kardava L, et al. T-bet+ B cells are induced by human viral  
970 infections and dominate the HIV gp140 response. *JCI Insight.* 2017;2(8).
- 971 24. Wang S, Wang J, Kumar V, et al. IL-21 drives expansion and plasma cell differentiation  
972 of autoreactive CD11c(hi)T-bet(+) B cells in SLE. *Nat Commun.* 2018;9(1):1758.
- 973 25. Jenks SA, Cashman KS, Zumaquero E, et al. Distinct Effector B Cells Induced by  
974 Unregulated Toll-like Receptor 7 Contribute to Pathogenic Responses in Systemic  
975 Lupus Erythematosus. *Immunity.* 2018;49(4):725-739 e726.
- 976 26. Rubtsova K, Rubtsov AV, van Dyk LF, Kappler JW, Marrack P. T-box transcription factor  
977 T-bet, a key player in a unique type of B-cell activation essential for effective viral  
978 clearance. *Proc Natl Acad Sci U S A.* 2013;110(34):E3216-3224.
- 979 27. Rubtsova K, Rubtsov AV, Thurman JM, Mennona JM, Kappler JW, Marrack P. B cells  
980 expressing the transcription factor T-bet drive lupus-like autoimmunity. *J Clin Invest.*  
981 2017;127(4):1392-1404.
- 982 28. Peng SL, Szabo SJ, Glimcher LH. T-bet regulates IgG class switching and pathogenic  
983 autoantibody production. *Proc Natl Acad Sci U S A.* 2002;99(8):5545-5550.
- 984 29. Barnett BE, Staupe RP, Odorizzi PM, et al. Cutting Edge: B Cell-Intrinsic T-bet  
985 Expression Is Required To Control Chronic Viral Infection. *J Immunol.*  
986 2016;197(4):1017-1022.
- 987 30. Sobocki M, Mrouj K, Colinge J, et al. Cell-Cycle Regulation Accounts for Variability in Ki-  
988 67 Expression Levels. *Cancer Res.* 2017;77(10):2722-2734.
- 989 31. Miller I, Min M, Yang C, et al. Ki67 is a Graded Rather than a Binary Marker of  
990 Proliferation versus Quiescence. *Cell Rep.* 2018;24(5):1105-1112 e1105.
- 991 32. Lazarevic V, Glimcher LH, Lord GM. T-bet: a bridge between innate and adaptive  
992 immunity. *Nat Rev Immunol.* 2013;13(11):777-789.
- 993 33. Szabo SJ, Kim ST, Costa GL, Zhang X, Fathman CG, Glimcher LH. A novel transcription  
994 factor, T-bet, directs Th1 lineage commitment. *Cell.* 2000;100(6):655-669.
- 995 34. Sanz I, Wei C, Lee FE, Anolik J. Phenotypic and functional heterogeneity of human  
996 memory B cells. *Semin Immunol.* 2008;20(1):67-82.
- 997 35. Kallies A, Hasbold J, Tarlinton DM, et al. Plasma cell ontogeny defined by quantitative  
998 changes in blimp-1 expression. *J Exp Med.* 2004;200(8):967-977.
- 999 36. Kallies A, Hasbold J, Fairfax K, et al. Initiation of plasma-cell differentiation is  
1000 independent of the transcription factor Blimp-1. *Immunity.* 2007;26(5):555-566.
- 1001 37. Shapiro-Shelef M, Lin KI, McHeyzer-Williams LJ, Liao J, McHeyzer-Williams MG,  
1002 Calame K. Blimp-1 is required for the formation of immunoglobulin secreting plasma  
1003 cells and pre-plasma memory B cells. *Immunity.* 2003;19(4):607-620.
- 1004 38. Shaffer AL, Lin KI, Kuo TC, et al. Blimp-1 orchestrates plasma cell differentiation by  
1005 extinguishing the mature B cell gene expression program. *Immunity.* 2002;17(1):51-62.
- 1006 39. Raymond DD, Bajic G, Ferdman J, et al. Conserved epitope on influenza-virus  
1007 hemagglutinin head defined by a vaccine-induced antibody. *Proc Natl Acad Sci U S A.*  
1008 2018;115(1):168-173.

- 1009 40. Linderman SL, Chambers BS, Zost SJ, et al. Potential antigenic explanation for atypical  
1010 H1N1 infections among middle-aged adults during the 2013-2014 influenza season.  
1011 *Proc Natl Acad Sci U S A*. 2014;111(44):15798-15803.
- 1012 41. Iwakoshi NN, Lee AH, Vallabhajosyula P, Otipoby KL, Rajewsky K, Glimcher LH.  
1013 Plasma cell differentiation and the unfolded protein response intersect at the  
1014 transcription factor XBP-1. *Nat Immunol*. 2003;4(4):321-329.
- 1015 42. Iwakoshi NN, Lee AH, Glimcher LH. The X-box binding protein-1 transcription factor is  
1016 required for plasma cell differentiation and the unfolded protein response. *Immunol Rev*.  
1017 2003;194:29-38.
- 1018 43. Ochiai K, Maienschein-Cline M, Simonetti G, et al. Transcriptional regulation of germinal  
1019 center B and plasma cell fates by dynamical control of IRF4. *Immunity*. 2013;38(5):918-  
1020 929.
- 1021 44. Sciammas R, Shaffer AL, Schatz JH, Zhao H, Staudt LM, Singh H. Graded expression of  
1022 interferon regulatory factor-4 coordinates isotype switching with plasma cell  
1023 differentiation. *Immunity*. 2006;25(2):225-236.
- 1024 45. Omilusik KD, Best JA, Yu B, et al. Transcriptional repressor ZEB2 promotes terminal  
1025 differentiation of CD8+ effector and memory T cell populations during infection. *J Exp*  
1026 *Med*. 2015;212(12):2027-2039.
- 1027 46. Dominguez CX, Amezcua RA, Guan T, et al. The transcription factors ZEB2 and T-bet  
1028 cooperate to program cytotoxic T cell terminal differentiation in response to LCMV viral  
1029 infection. *J Exp Med*. 2015;212(12):2041-2056.
- 1030 47. Schaerli P, Moser B. Chemokines: control of primary and memory T-cell traffic. *Immunol*  
1031 *Res*. 2005;31(1):57-74.
- 1032 48. Kaech SM, Hemby S, Kersh E, Ahmed R. Molecular and functional profiling of memory  
1033 CD8 T cell differentiation. *Cell*. 2002;111(6):837-851.
- 1034 49. Wherry EJ, Ha SJ, Kaech SM, et al. Molecular signature of CD8+ T cell exhaustion  
1035 during chronic viral infection. *Immunity*. 2007;27(4):670-684.
- 1036 50. Luckey CJ, Bhattacharya D, Goldrath AW, Weissman IL, Benoist C, Mathis D. Memory T  
1037 and memory B cells share a transcriptional program of self-renewal with long-term  
1038 hematopoietic stem cells. *Proc Natl Acad Sci U S A*. 2006;103(9):3304-3309.
- 1039 51. Shaffer AL, Emre NC, Lamy L, et al. IRF4 addiction in multiple myeloma. *Nature*.  
1040 2008;454(7201):226-231.
- 1041 52. Yu B, Zhang K, Milner JJ, et al. Epigenetic landscapes reveal transcription factors that  
1042 regulate CD8(+) T cell differentiation. *Nat Immunol*. 2017;18(5):573-582.
- 1043 53. Kurachi M, Barnitz RA, Yosef N, et al. The transcription factor BATF operates as an  
1044 essential differentiation checkpoint in early effector CD8+ T cells. *Nat Immunol*.  
1045 2014;15(4):373-383.
- 1046 54. Kanda M, Yamanaka H, Kojo S, et al. Transcriptional regulator Bhlhe40 works as a  
1047 cofactor of T-bet in the regulation of IFN-gamma production in iNKT cells. *Proc Natl*  
1048 *Acad Sci U S A*. 2016;113(24):E3394-3402.
- 1049 55. Zhou X, Yu S, Zhao DM, Harty JT, Badovinac VP, Xue HH. Differentiation and  
1050 persistence of memory CD8(+) T cells depend on T cell factor 1. *Immunity*.  
1051 2010;33(2):229-240.
- 1052 56. Scharer CD, Barwick BG, Guo M, Bally APR, Boss JM. Plasma cell differentiation is  
1053 controlled by multiple cell division-coupled epigenetic programs. *Nat Commun*.  
1054 2018;9(1):1698.
- 1055 57. Caron G, Hussein M, Kulis M, et al. Cell-Cycle-Dependent Reconfiguration of the DNA  
1056 Methylome during Terminal Differentiation of Human B Cells into Plasma Cells. *Cell*  
1057 *Rep*. 2015;13(5):1059-1071.
- 1058 58. Buttitta LA, Edgar BA. Mechanisms controlling cell cycle exit upon terminal  
1059 differentiation. *Curr Opin Cell Biol*. 2007;19(6):697-704.

- 1060 59. Rakhmanov M, Sic H, Kienzler AK, et al. High levels of SOX5 decrease proliferative  
1061 capacity of human B cells, but permit plasmablast differentiation. *PLoS One*.  
1062 2014;9(6):e100328.
- 1063 60. Mitxelena J, Apraiz A, Vallejo-Rodriguez J, Malumbres M, Zubiaga AM. E2F7 regulates  
1064 transcription and maturation of multiple microRNAs to restrain cell proliferation. *Nucleic  
1065 Acids Res*. 2016.
- 1066 61. Westendorp B, Mokry M, Groot Koerkamp MJ, Holstege FC, Cuppen E, de Bruin A.  
1067 E2F7 represses a network of oscillating cell cycle genes to control S-phase progression.  
1068 *Nucleic Acids Res*. 2012;40(8):3511-3523.
- 1069 62. Schebesta A, McManus S, Salvagiotto G, Delogu A, Busslinger GA, Busslinger M.  
1070 Transcription factor Pax5 activates the chromatin of key genes involved in B cell  
1071 signaling, adhesion, migration, and immune function. *Immunity*. 2007;27(1):49-63.
- 1072 63. Casolari DA, Makri M, Yoshida C, Muto A, Igarashi K, Melo JV. Transcriptional  
1073 suppression of BACH2 by the Bcr-Abl oncoprotein is mediated by PAX5. *Leukemia*.  
1074 2013;27(2):409-415.
- 1075 64. Hipp N, Symington H, Pastoret C, et al. IL-2 imprints human naive B cell fate towards  
1076 plasma cell through ERK/ELK1-mediated BACH2 repression. *Nat Commun*.  
1077 2017;8(1):1443.
- 1078 65. Le Gallou S, Caron G, Delalay C, Rossille D, Tarte K, Fest T. IL-2 requirement for  
1079 human plasma cell generation: coupling differentiation and proliferation by enhancing  
1080 MAPK-ERK signaling. *J Immunol*. 2012;189(1):161-173.
- 1081 66. Tourigny MR, Ursini-Siegel J, Lee H, et al. CDK inhibitor p18(INK4c) is required for the  
1082 generation of functional plasma cells. *Immunity*. 2002;17(2):179-189.
- 1083 67. Morse L, Chen D, Franklin D, Xiong Y, Chen-Kiang S. Induction of cell cycle arrest and  
1084 B cell terminal differentiation by CDK inhibitor p18(INK4c) and IL-6. *Immunity*.  
1085 1997;6(1):47-56.
- 1086 68. Schrantz N, Beney GE, Auffredou MT, Bourgeade MF, Leca G, Vazquez A. The  
1087 expression of p18INK4 and p27kip1 cyclin-dependent kinase inhibitors is regulated  
1088 differently during human B cell differentiation. *J Immunol*. 2000;165(8):4346-4352.
- 1089 69. Oestreich KJ, Read KA, Gilbertson SE, et al. Bcl-6 directly represses the gene program  
1090 of the glycolysis pathway. *Nat Immunol*. 2014;15(10):957-964.
- 1091 70. Hough KP, Chisolm DA, Weinmann AS. Transcriptional regulation of T cell metabolism.  
1092 *Mol Immunol*. 2015;68(2 Pt C):520-526.
- 1093 71. Takayanagi S, Fukuda R, Takeuchi Y, Tsukada S, Yoshida K. Gene regulatory network  
1094 of unfolded protein response genes in endoplasmic reticulum stress. *Cell Stress  
1095 Chaperones*. 2013;18(1):11-23.
- 1096 72. Hung CL, Wang LY, Yu YL, et al. A long noncoding RNA connects c-Myc to tumor  
1097 metabolism. *Proc Natl Acad Sci U S A*. 2014;111(52):18697-18702.
- 1098 73. Gibellini L, Losi L, De Biasi S, et al. LonP1 Differently Modulates Mitochondrial Function  
1099 and Bioenergetics of Primary Versus Metastatic Colon Cancer Cells. *Front Oncol*.  
1100 2018;8:254.
- 1101 74. Yoshida S, Tsutsumi S, Muhlebach G, et al. Molecular chaperone TRAP1 regulates a  
1102 metabolic switch between mitochondrial respiration and aerobic glycolysis. *Proc Natl  
1103 Acad Sci U S A*. 2013;110(17):E1604-1612.
- 1104 75. van der Windt GJ, Everts B, Chang CH, et al. Mitochondrial respiratory capacity is a  
1105 critical regulator of CD8+ T cell memory development. *Immunity*. 2012;36(1):68-78.
- 1106 76. McCarthy KR, Watanabe A, Kuraoka M, et al. Memory B Cells that Cross-React with  
1107 Group 1 and Group 2 Influenza A Viruses Are Abundant in Adult Human Repertoires.  
1108 *Immunity*. 2018;48(1):174-184 e179.
- 1109 77. Wang J, Hilchey SP, Hyrien O, et al. Multi-Dimensional Measurement of Antibody-  
1110 Mediated Heterosubtypic Immunity to Influenza. *PLoS One*. 2015;10(6):e0129858.

- 1111 78. Xu R, Ekiert DC, Krause JC, Hai R, Crowe JE, Jr., Wilson IA. Structural basis of  
1112 preexisting immunity to the 2009 H1N1 pandemic influenza virus. *Science*.  
1113 2010;328(5976):357-360.
- 1114 79. Smith GJ, Vijaykrishna D, Bahl J, et al. Origins and evolutionary genomics of the 2009  
1115 swine-origin H1N1 influenza A epidemic. *Nature*. 2009;459(7250):1122-1125.
- 1116 80. Takahashi Y, Dutta PR, Cerasoli DM, Kelsoe G. In situ studies of the primary immune  
1117 response to (4-hydroxy-3-nitrophenyl)acetyl. V. Affinity maturation develops in two  
1118 stages of clonal selection. *J Exp Med*. 1998;187(6):885-895.
- 1119 81. Zumaquero E, Stone SL, Scharer CD, et al. IFN $\gamma$  induces epigenetic programming  
1120 of human T-bet(hi) B cells and promotes TLR7/8 and IL-21 induced differentiation. *Elife*.  
1121 2019;8.
- 1122 82. Isnardi I, Ng YS, Menard L, et al. Complement receptor 2/CD21- human naive B cells  
1123 contain mostly autoreactive unresponsive clones. *Blood*. 2010;115(24):5026-5036.
- 1124 83. Moir S, Ho J, Malaspina A, et al. Evidence for HIV-associated B cell exhaustion in a  
1125 dysfunctional memory B cell compartment in HIV-infected viremic individuals. *J Exp*  
1126 *Med*. 2008;205(8):1797-1805.
- 1127 84. Kardava L, Moir S, Shah N, et al. Abnormal B cell memory subsets dominate HIV-  
1128 specific responses in infected individuals. *J Clin Invest*. 2014;124(7):3252-3262.
- 1129 85. Obeng-Adjei N, Portugal S, Holla P, et al. Malaria-induced interferon-gamma drives the  
1130 expansion of Tbethi atypical memory B cells. *PLoS Pathog*. 2017;13(9):e1006576.
- 1131 86. Buck MD, O'Sullivan D, Klein Geltink RI, et al. Mitochondrial Dynamics Controls T Cell  
1132 Fate through Metabolic Programming. *Cell*. 2016;166(1):63-76.
- 1133 87. Buck MD, Sowell RT, Kaech SM, Pearce EL. Metabolic Instruction of Immunity. *Cell*.  
1134 2017;169(4):570-586.
- 1135 88. Phan AT, Doedens AL, Palazon A, et al. Constitutive Glycolytic Metabolism Supports  
1136 CD8(+) T Cell Effector Memory Differentiation during Viral Infection. *Immunity*.  
1137 2016;45(5):1024-1037.
- 1138 89. Gass JN, Gifford NM, Brewer JW. Activation of an unfolded protein response during  
1139 differentiation of antibody-secreting B cells. *J Biol Chem*. 2002;277(50):49047-49054.
- 1140 90. Gass JN, Jiang HY, Wek RC, Brewer JW. The unfolded protein response of B-  
1141 lymphocytes: PERK-independent development of antibody-secreting cells. *Mol Immunol*.  
1142 2008;45(4):1035-1043.
- 1143 91. Tellier J, Shi W, Minnich M, et al. Blimp-1 controls plasma cell function through the  
1144 regulation of immunoglobulin secretion and the unfolded protein response. *Nat Immunol*.  
1145 2016;17(3):323-330.
- 1146 92. Shaffer AL, Shapiro-Shelef M, Iwakoshi NN, et al. XBP1, downstream of Blimp-1,  
1147 expands the secretory apparatus and other organelles, and increases protein synthesis  
1148 in plasma cell differentiation. *Immunity*. 2004;21(1):81-93.
- 1149 93. Taubenheim N, Tarlinton DM, Crawford S, Corcoran LM, Hodgkin PD, Nutt SL. High rate  
1150 of antibody secretion is not integral to plasma cell differentiation as revealed by XBP-1  
1151 deficiency. *J Immunol*. 2012;189(7):3328-3338.
- 1152 94. Pengo N, Scolari M, Oliva L, et al. Plasma cells require autophagy for sustainable  
1153 immunoglobulin production. *Nat Immunol*. 2013;14(3):298-305.
- 1154 95. Halliley JL, Tipton CM, Liesveld J, et al. Long-Lived Plasma Cells Are Contained within  
1155 the CD19(-)CD38(hi)CD138(+) Subset in Human Bone Marrow. *Immunity*.  
1156 2015;43(1):132-145.
- 1157 96. Nakaya HI, Hagan T, Duraisingam SS, et al. Systems Analysis of Immunity to Influenza  
1158 Vaccination across Multiple Years and in Diverse Populations Reveals Shared Molecular  
1159 Signatures. *Immunity*. 2015;43(6):1186-1198.

- 1160 97. Tan Y, Tamayo P, Nakaya H, Pulendran B, Mesirov JP, Haining WN. Gene signatures  
1161 related to B-cell proliferation predict influenza vaccine-induced antibody response. *Eur J*  
1162 *Immunol.* 2014;44(1):285-295.
- 1163 98. Takahashi Y, Kelsoe G. Role of germinal centers for the induction of broadly-reactive  
1164 memory B cells. *Curr Opin Immunol.* 2017;45:119-125.
- 1165 99. Finney J, Yeh CH, Kelsoe G, Kuraoka M. Germinal center responses to complex  
1166 antigens. *Immunol Rev.* 2018;284(1):42-50.
- 1167 100. Kuraoka M, Schmidt AG, Nojima T, et al. Complex Antigens Drive Permissive Clonal  
1168 Selection in Germinal Centers. *Immunity.* 2016;44(3):542-552.
- 1169 101. Sanyal M, Holmes TH, Maecker HT, et al. Diminished B-Cell Response After Repeat  
1170 Influenza Vaccination. *J Infect Dis.* 2019;219(10):1586-1595.
- 1171 102. Zarnitsyna VI, Ellebedy AH, Davis C, Jacob J, Ahmed R, Antia R. Masking of antigenic  
1172 epitopes by antibodies shapes the humoral immune response to influenza. *Philos Trans*  
1173 *R Soc Lond B Biol Sci.* 2015;370(1676).
- 1174 103. Onodera T, Takahashi Y, Yokoi Y, et al. Memory B cells in the lung participate in  
1175 protective humoral immune responses to pulmonary influenza virus reinfection. *Proc Natl*  
1176 *Acad Sci U S A.* 2012;109(7):2485-2490.
- 1177 104. Heinz S, Benner C, Spann N, et al. Simple combinations of lineage-determining  
1178 transcription factors prime cis-regulatory elements required for macrophage and B cell  
1179 identities. *Mol Cell.* 2010;38(4):576-589.
- 1180 105. Lawrence M, Huber W, Pages H, et al. Software for computing and annotating genomic  
1181 ranges. *PLoS Comput Biol.* 2013;9(8):e1003118.
- 1182 106. Scharer CD, Blalock EL, Barwick BG, et al. ATAC-seq on biobanked specimens defines  
1183 a unique chromatin accessibility structure in naive SLE B cells. *Sci Rep.* 2016;6:27030.
- 1184 107. Tipton CM, Fucile CF, Darce J, et al. Diversity, cellular origin and autoreactivity of  
1185 antibody-secreting cell population expansions in acute systemic lupus erythematosus.  
1186 *Nat Immunol.* 2015;16(7):755-765.
- 1187



**Figure 1**

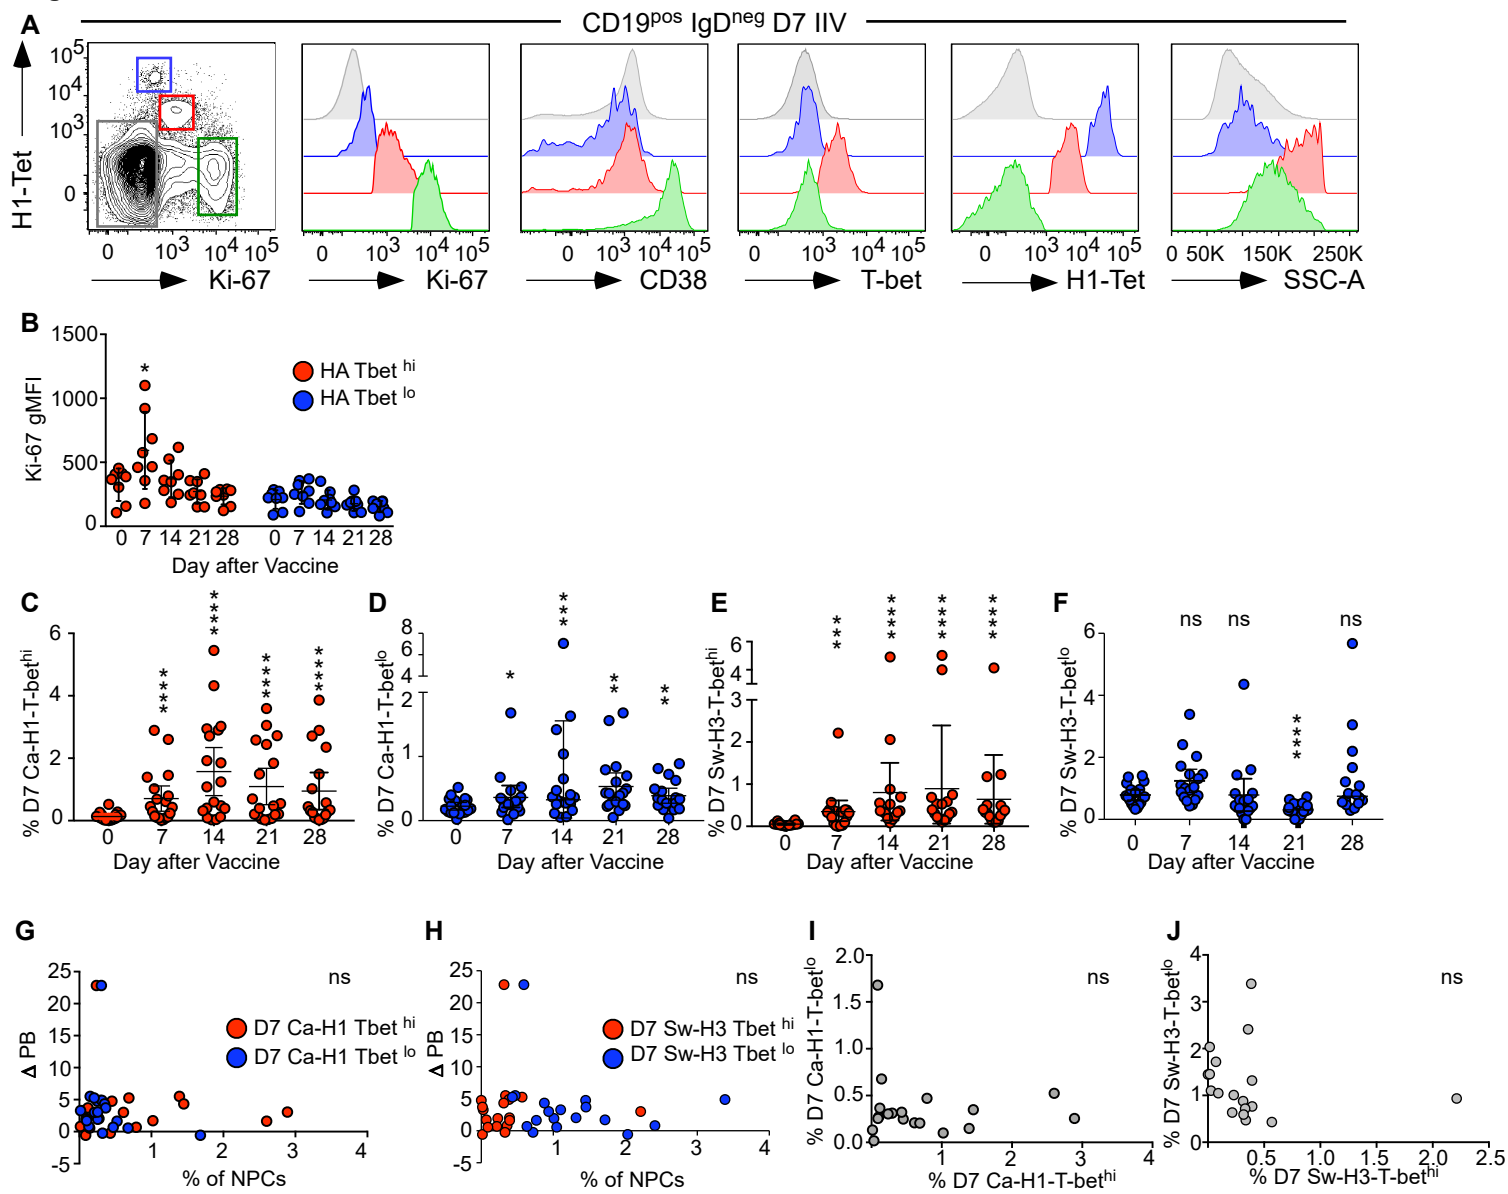

**Figure 2**

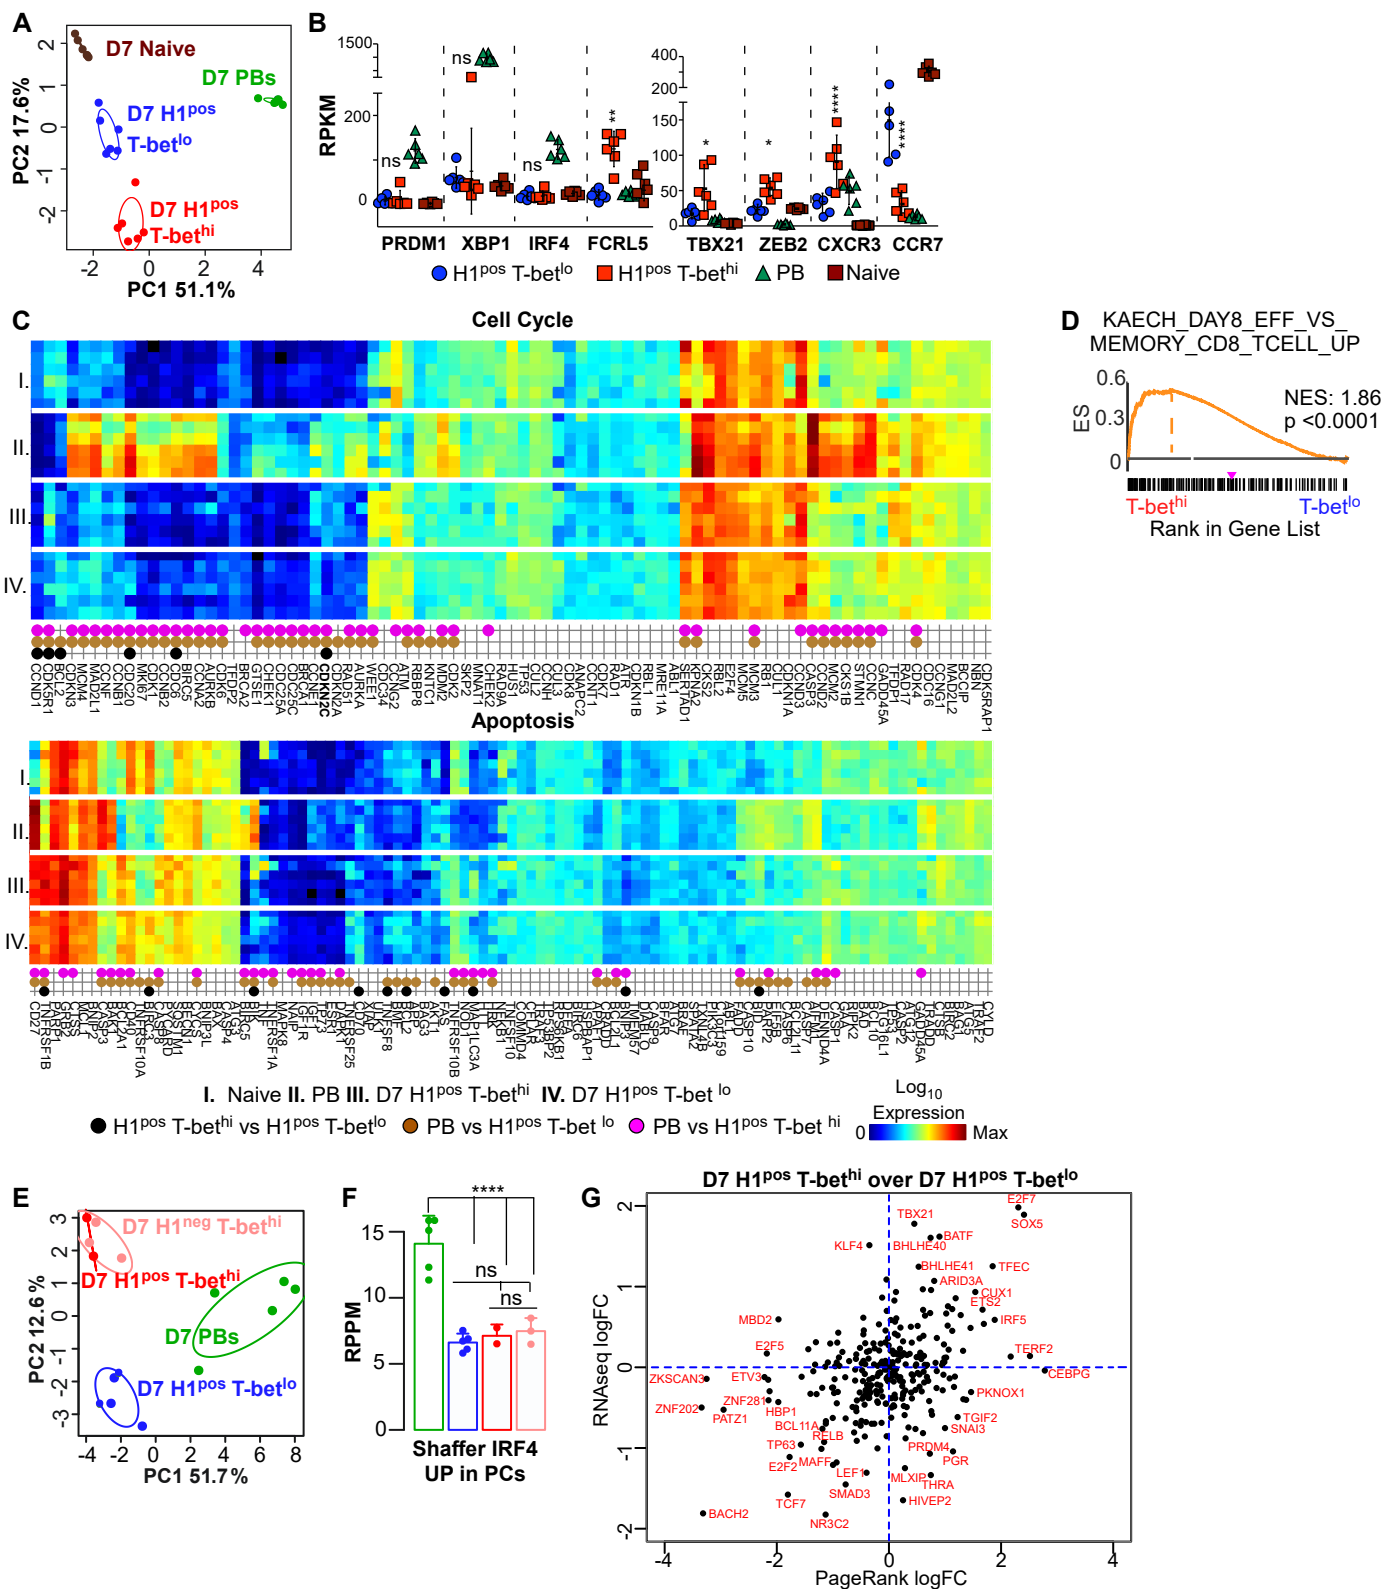

**Figure 3**

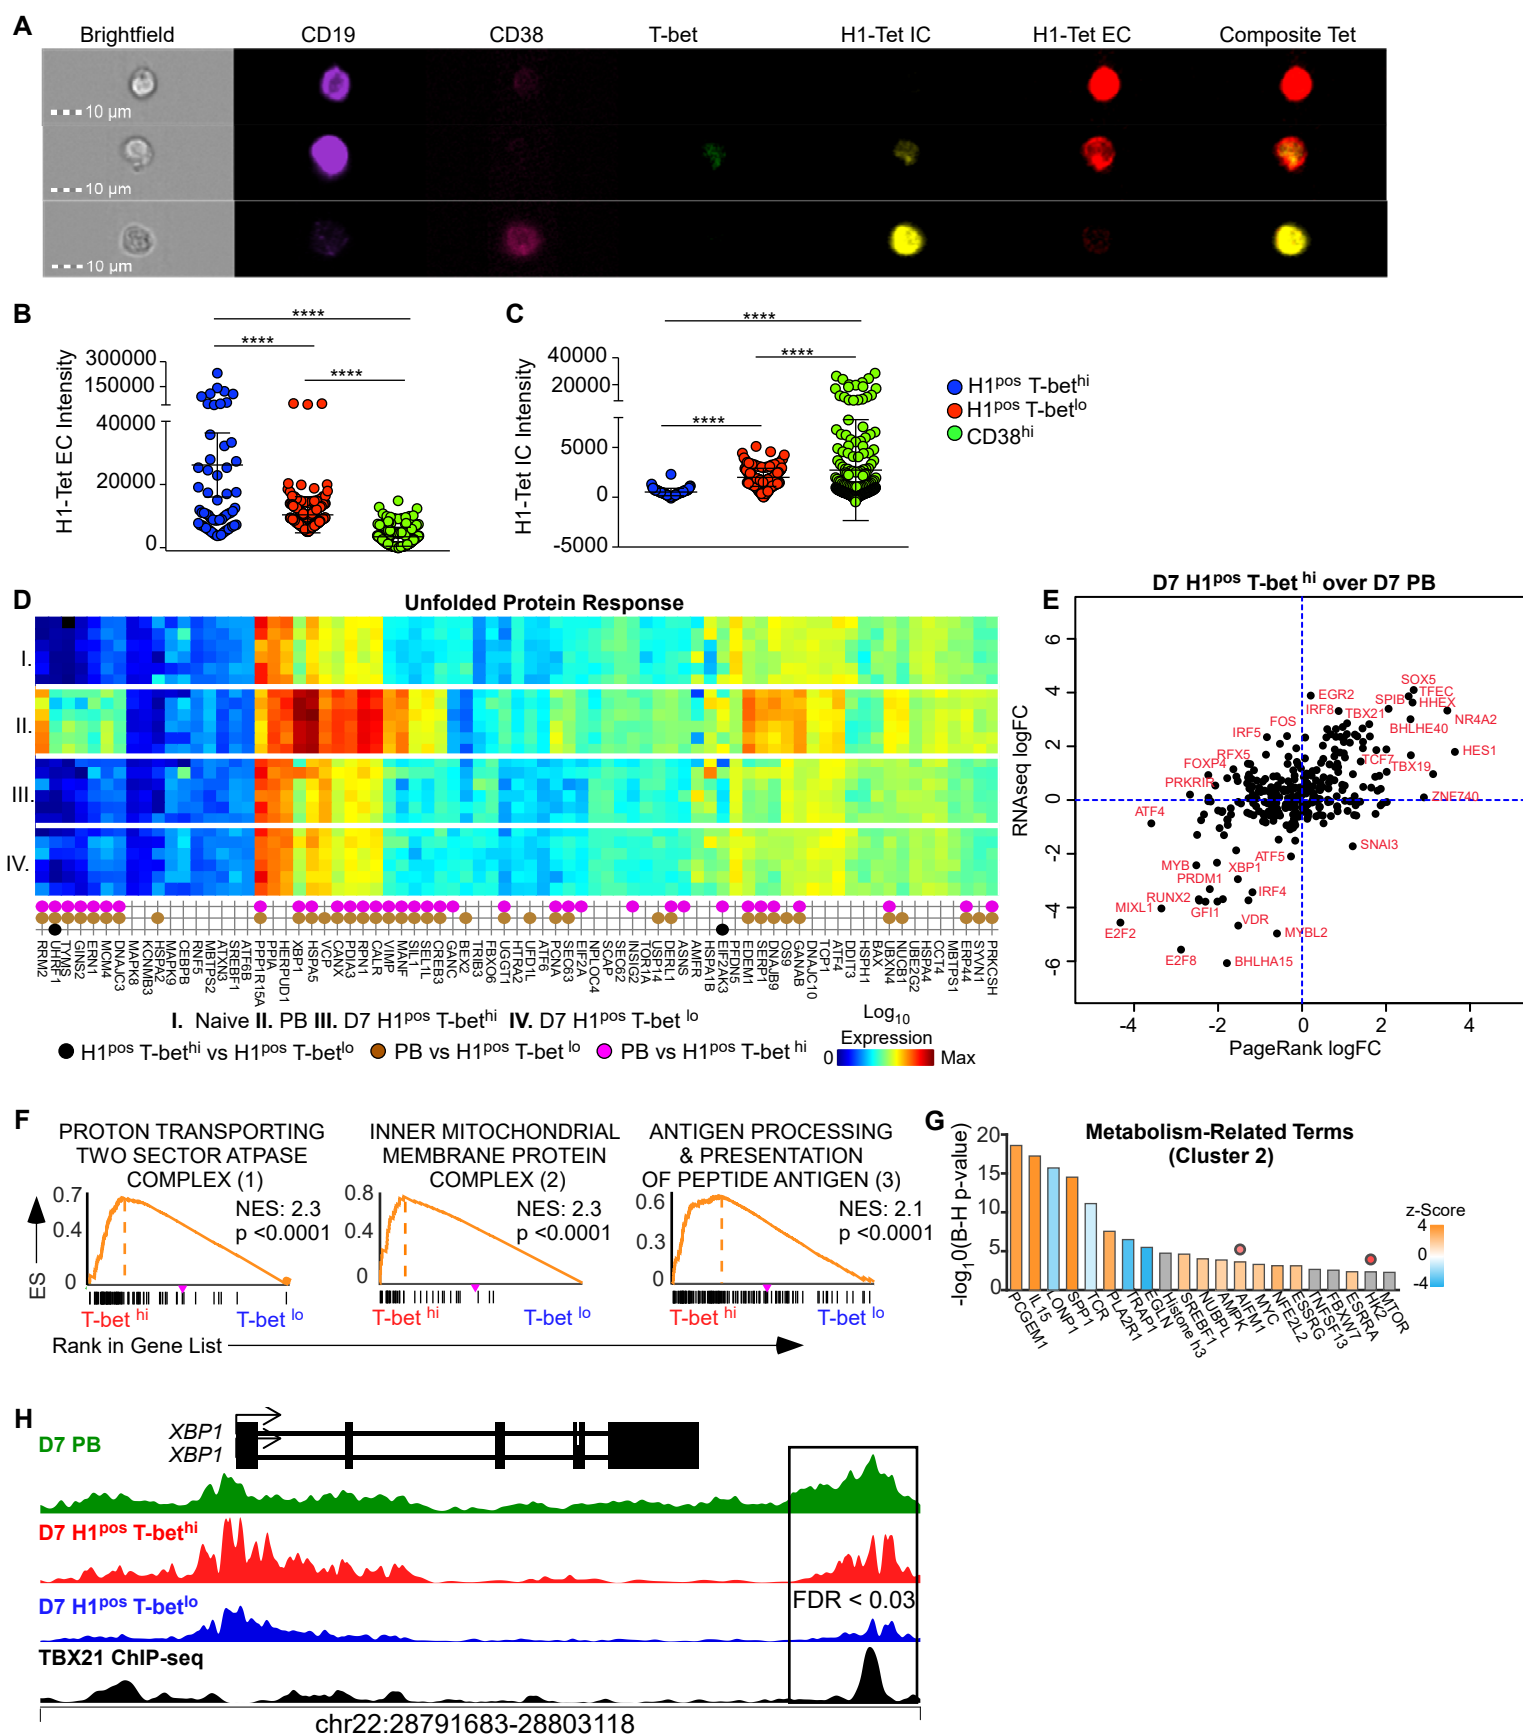

**Figure 4**

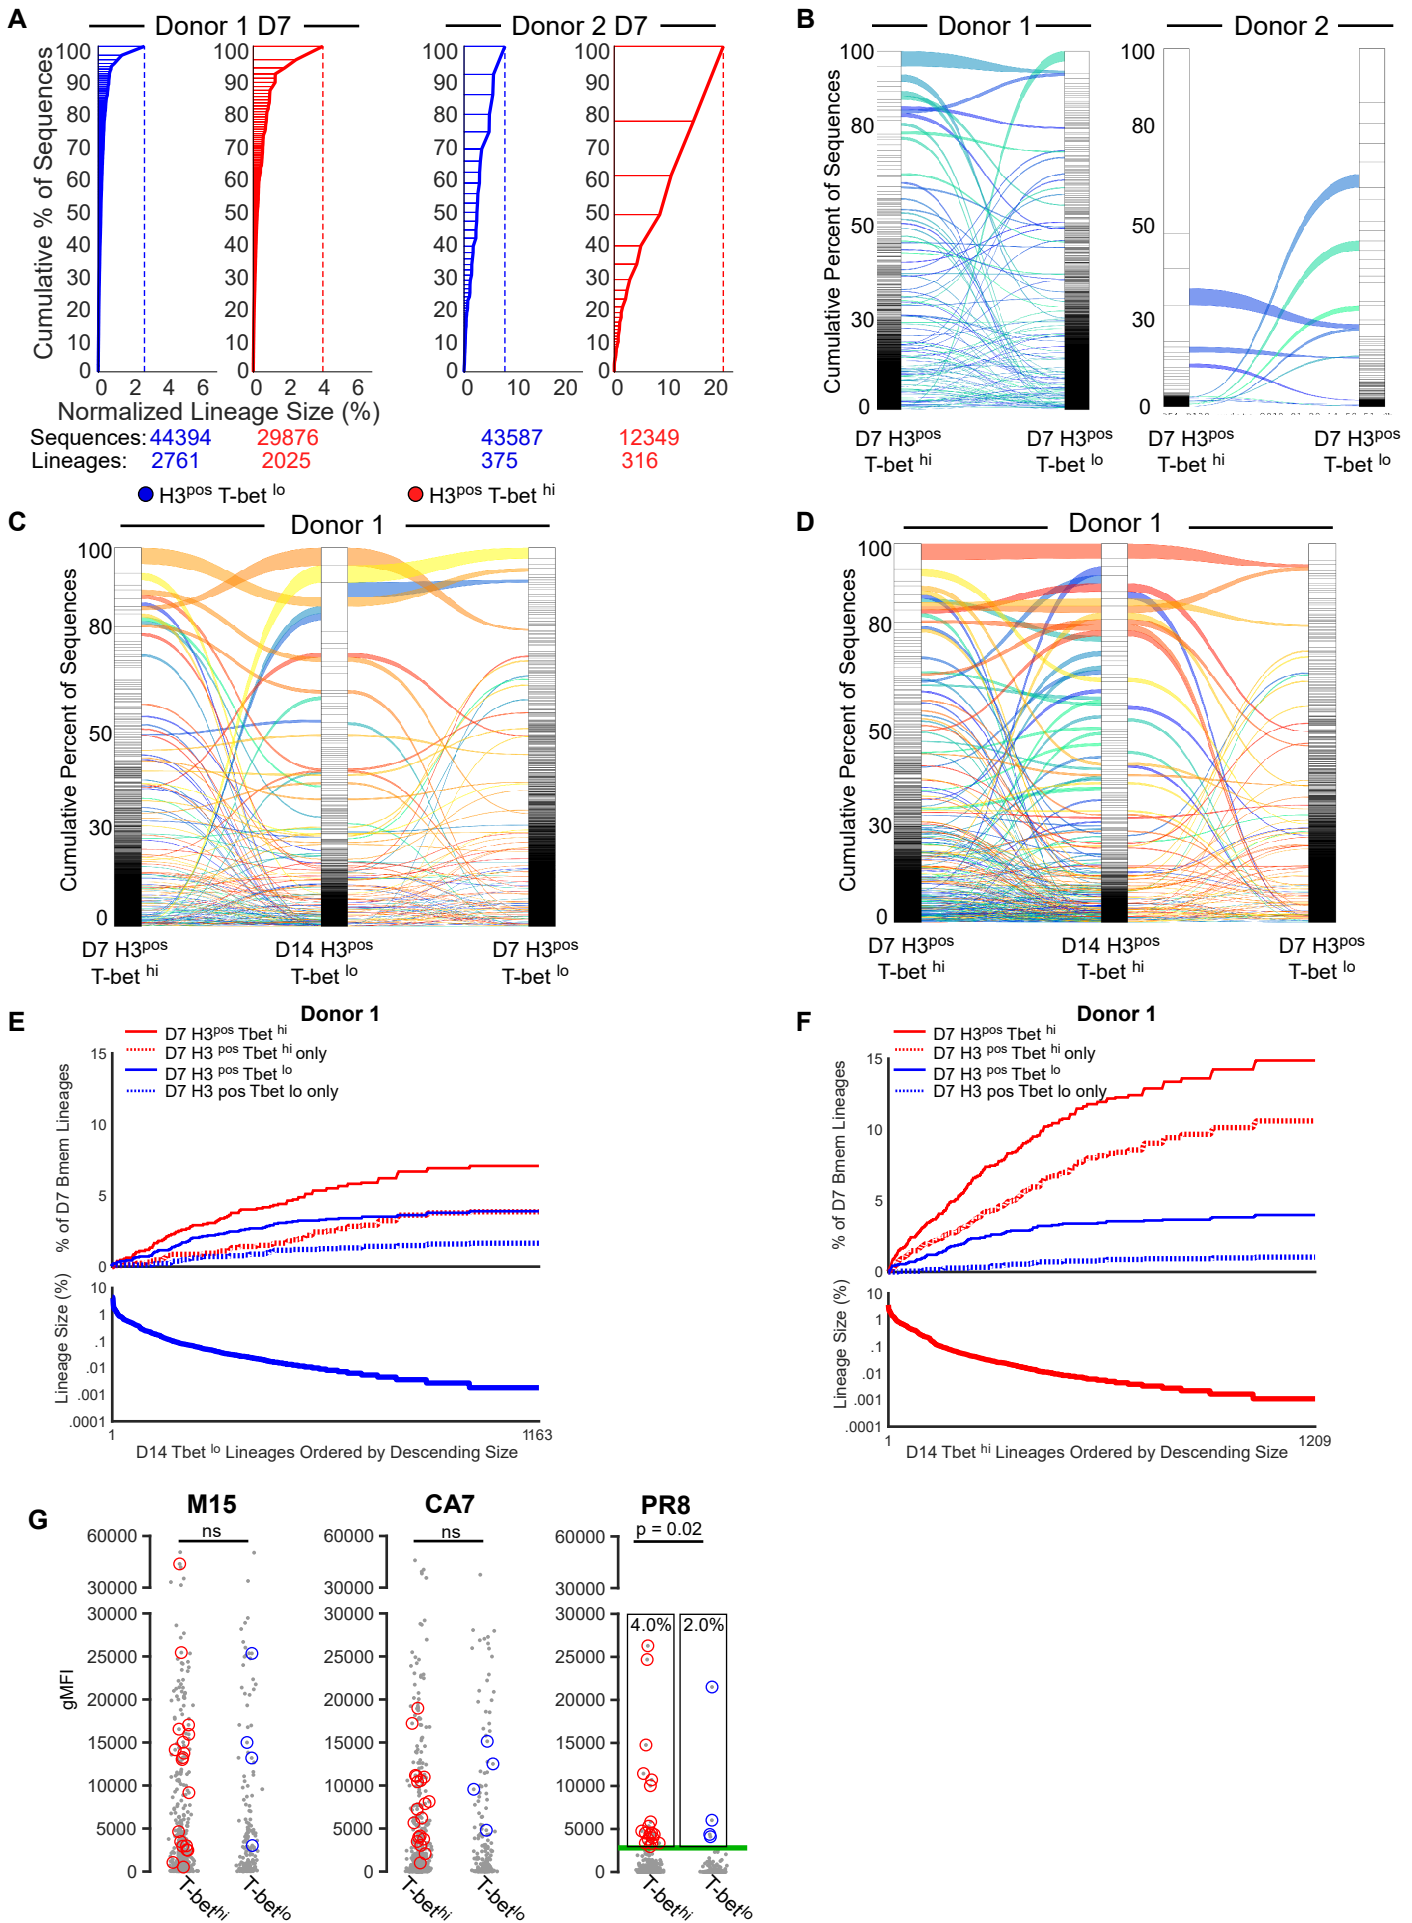

**Figure 5**

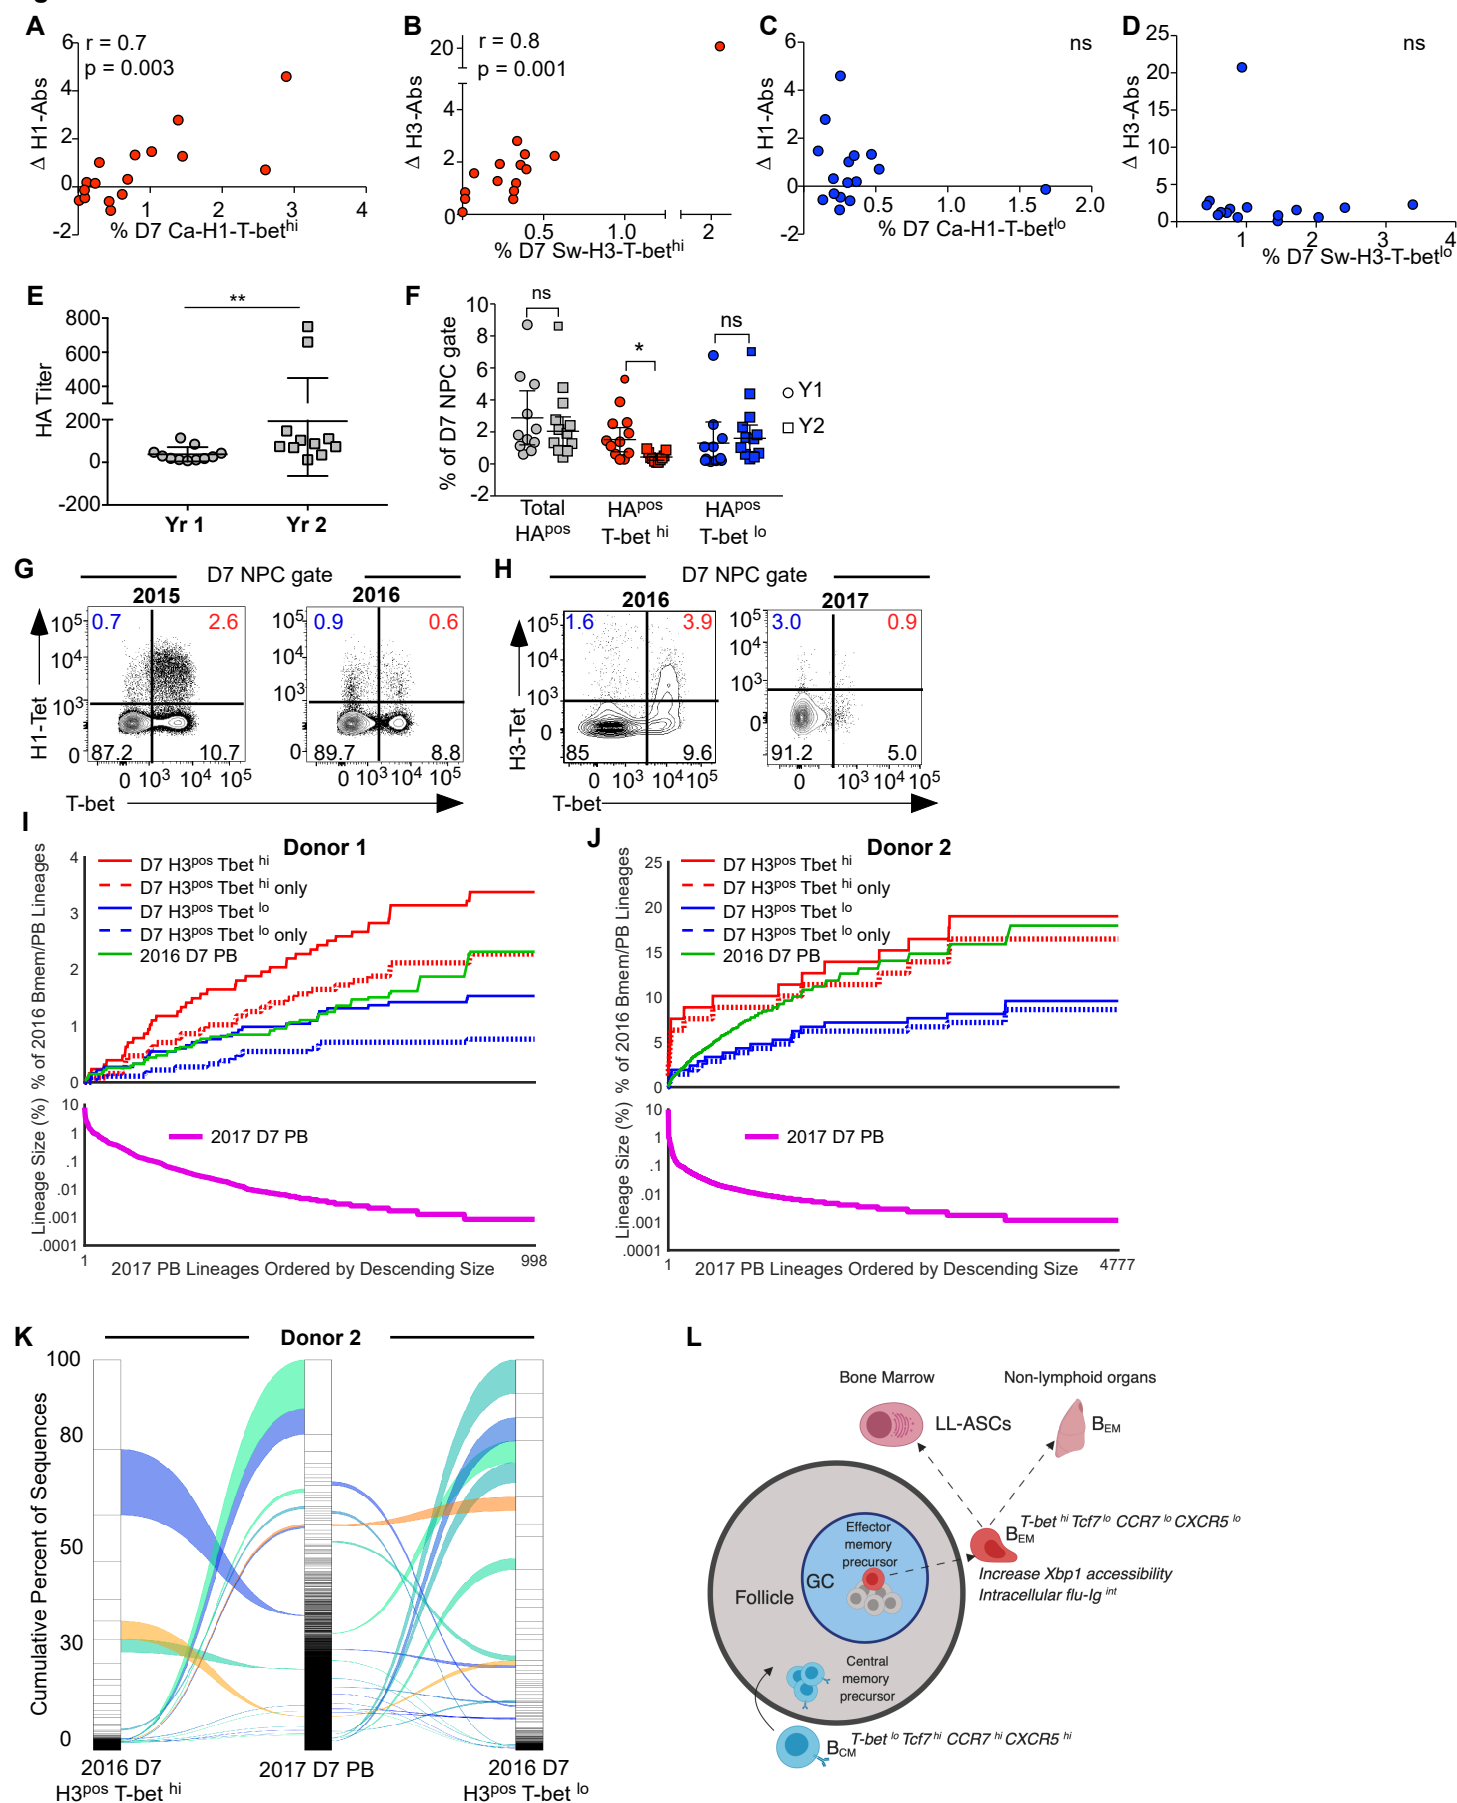

**Supplemental Figure 1**

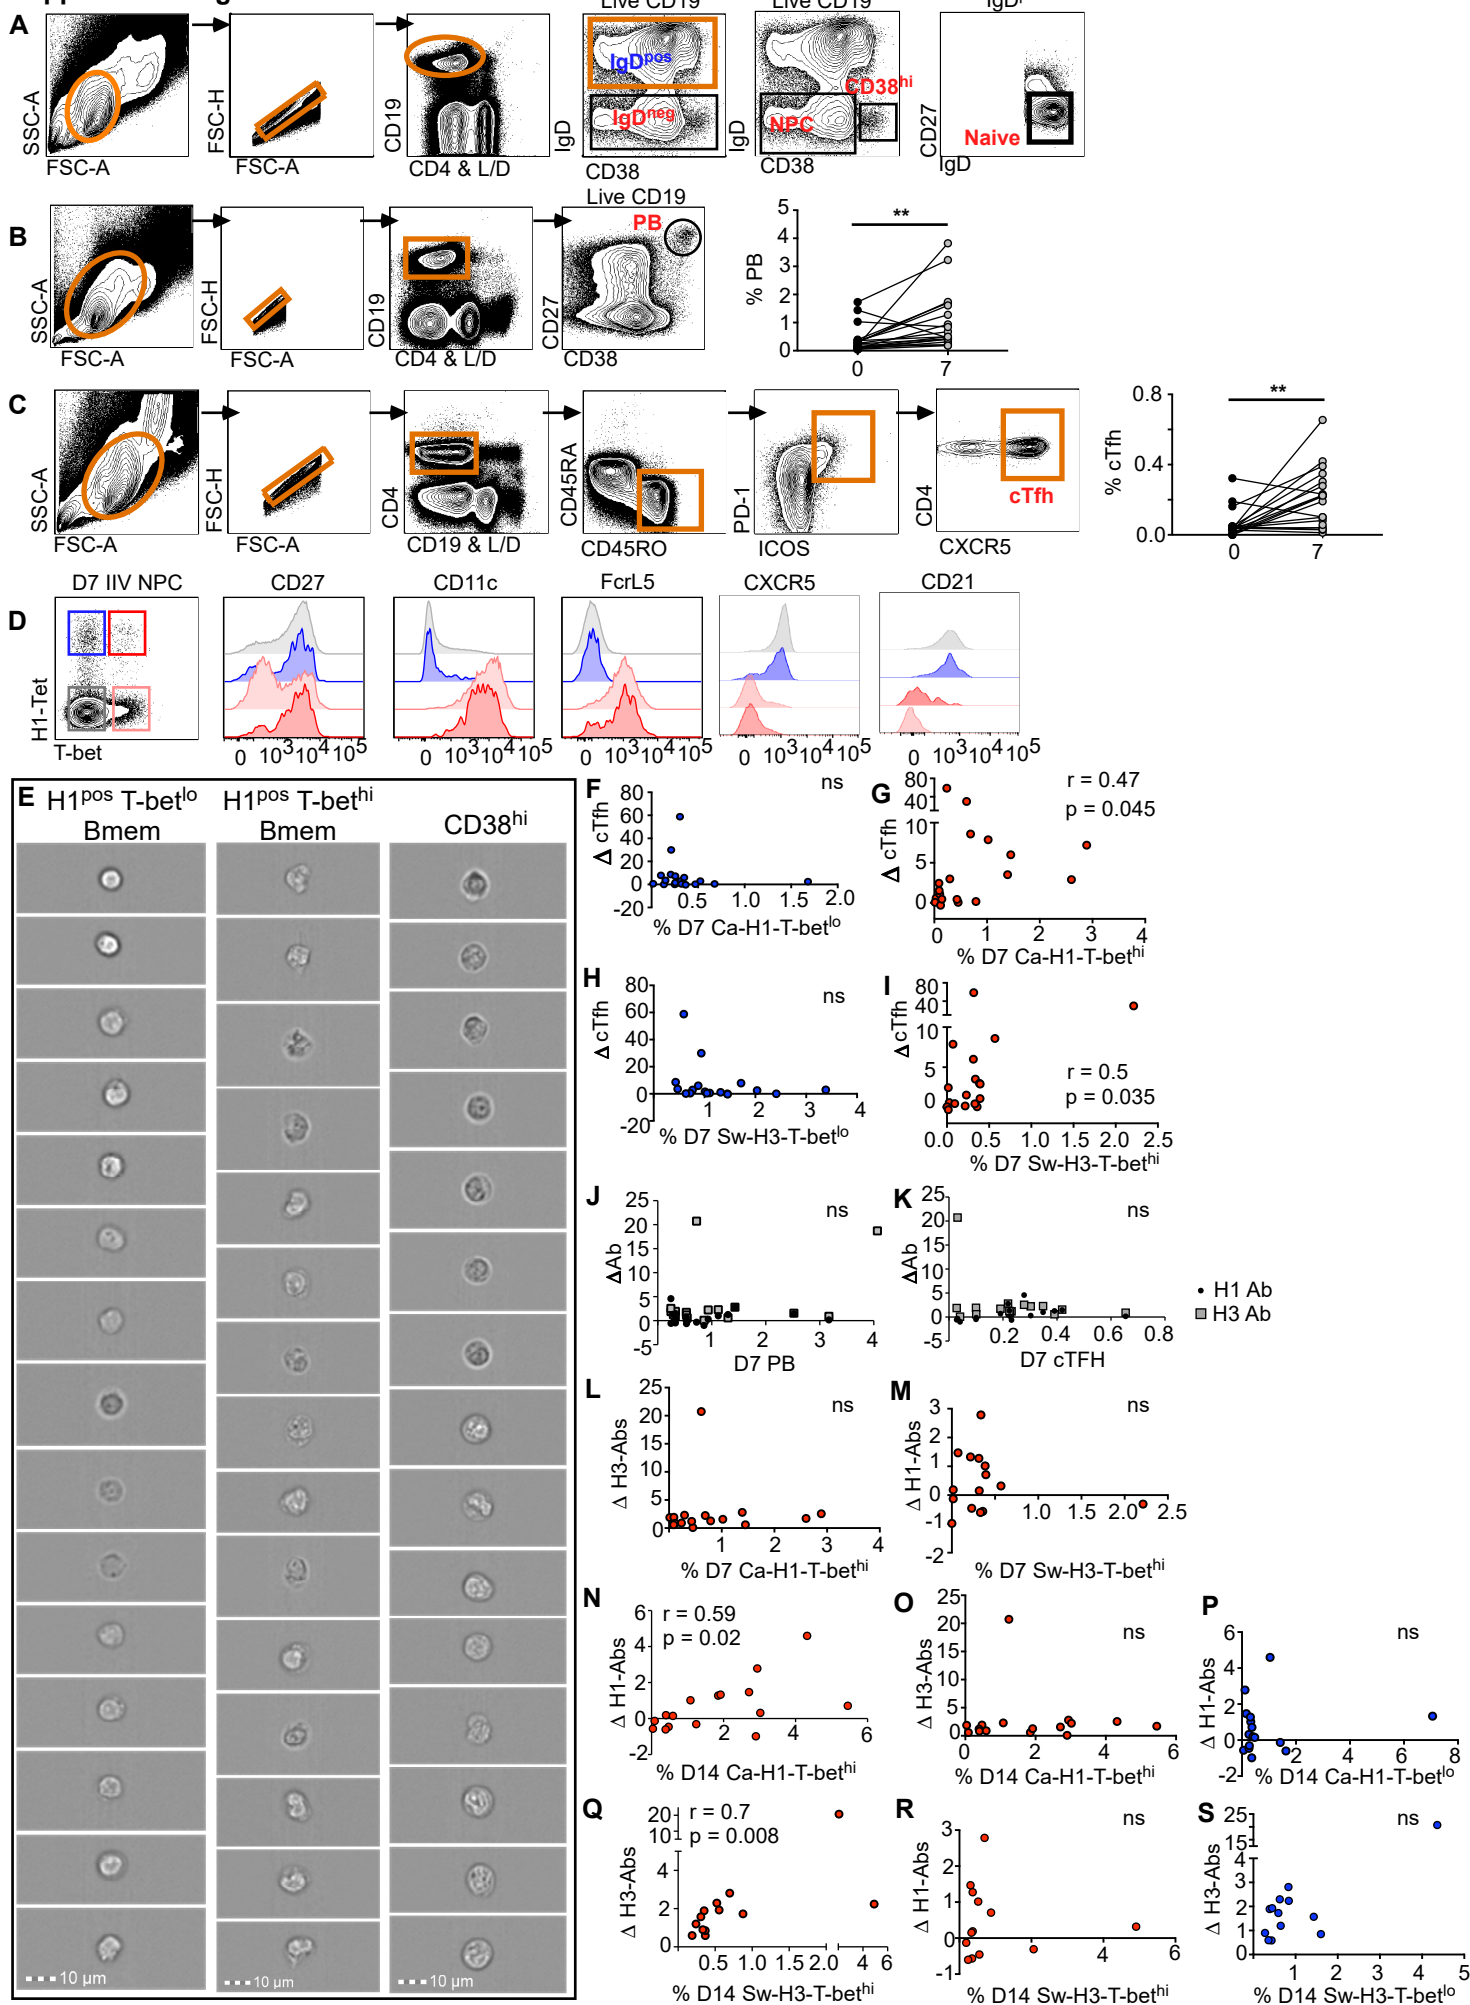

## Supplemental Figure 2

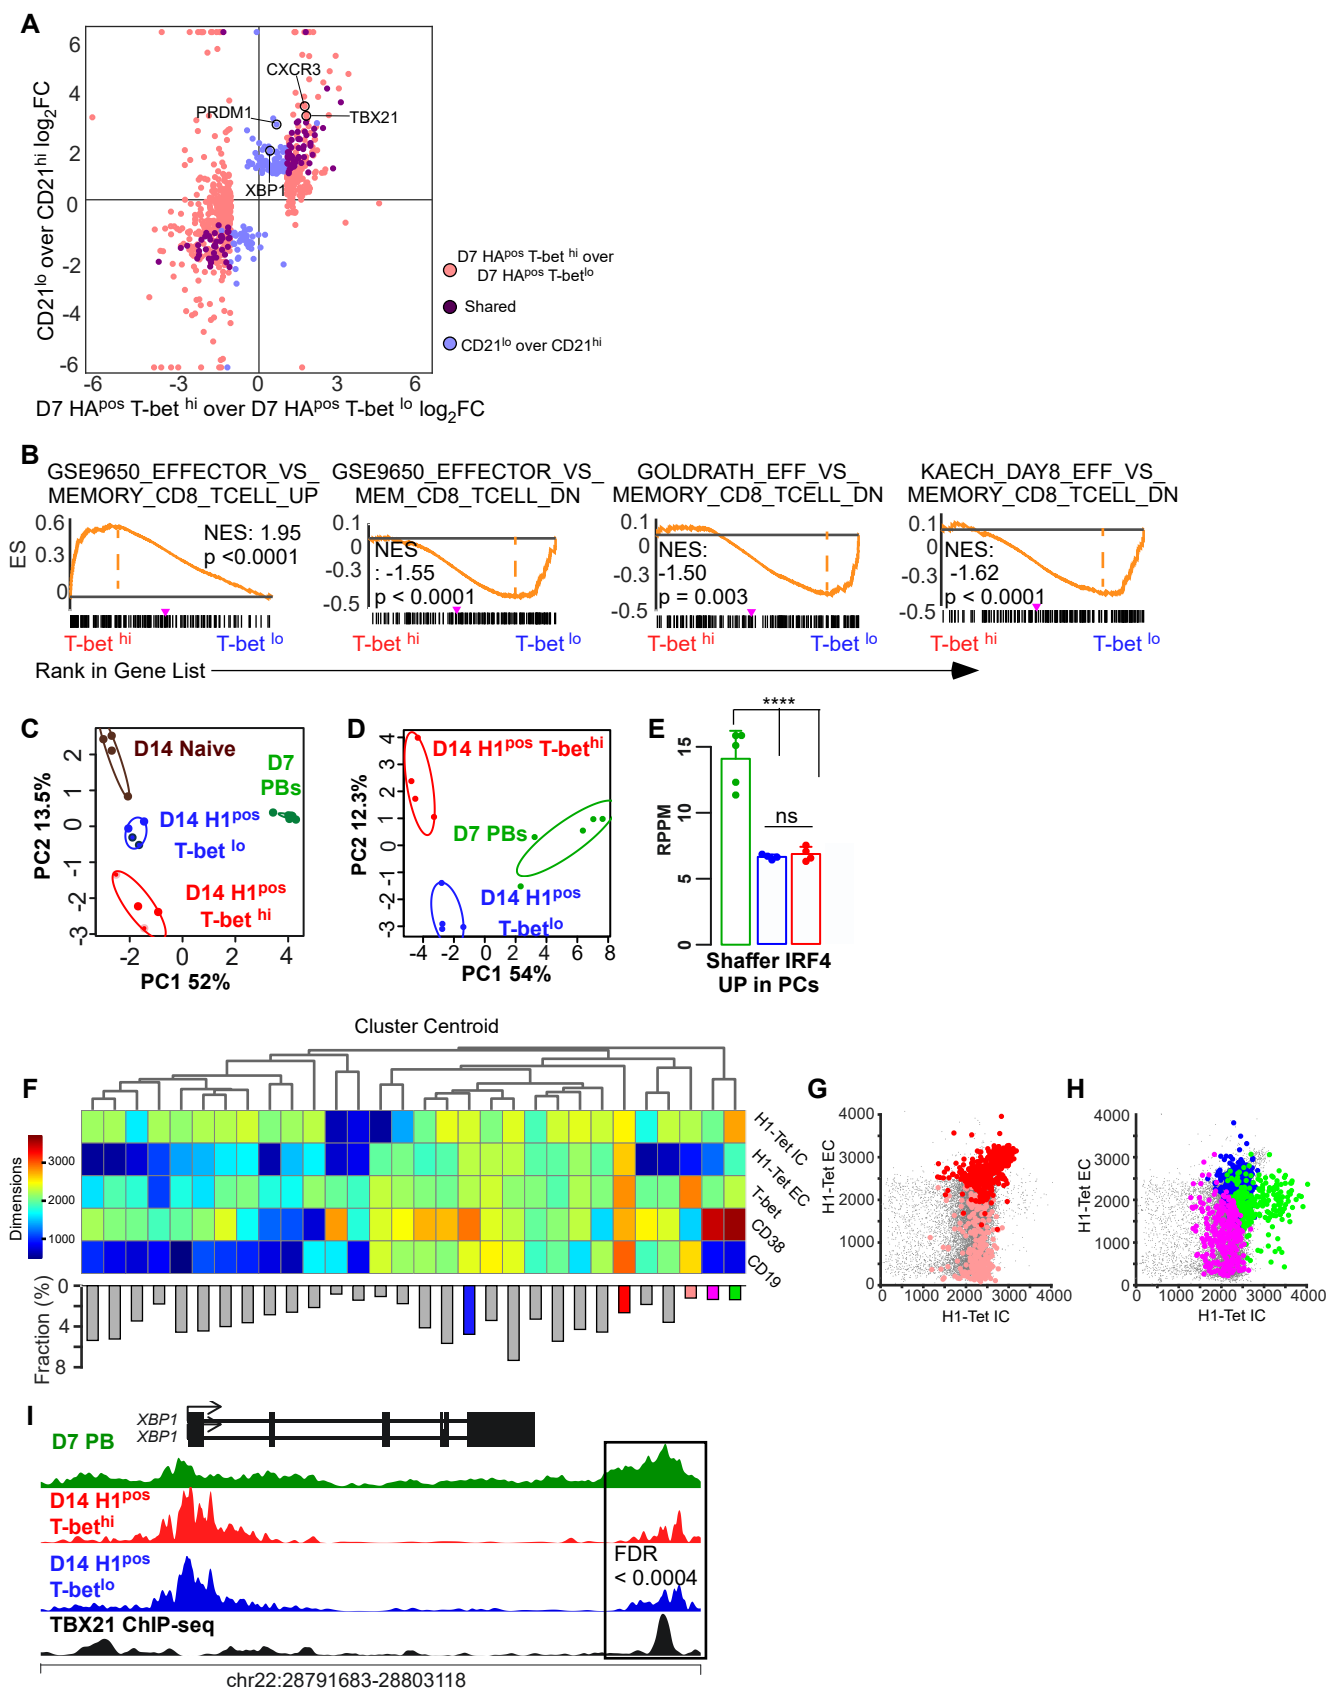

### Supplemental Figure 3

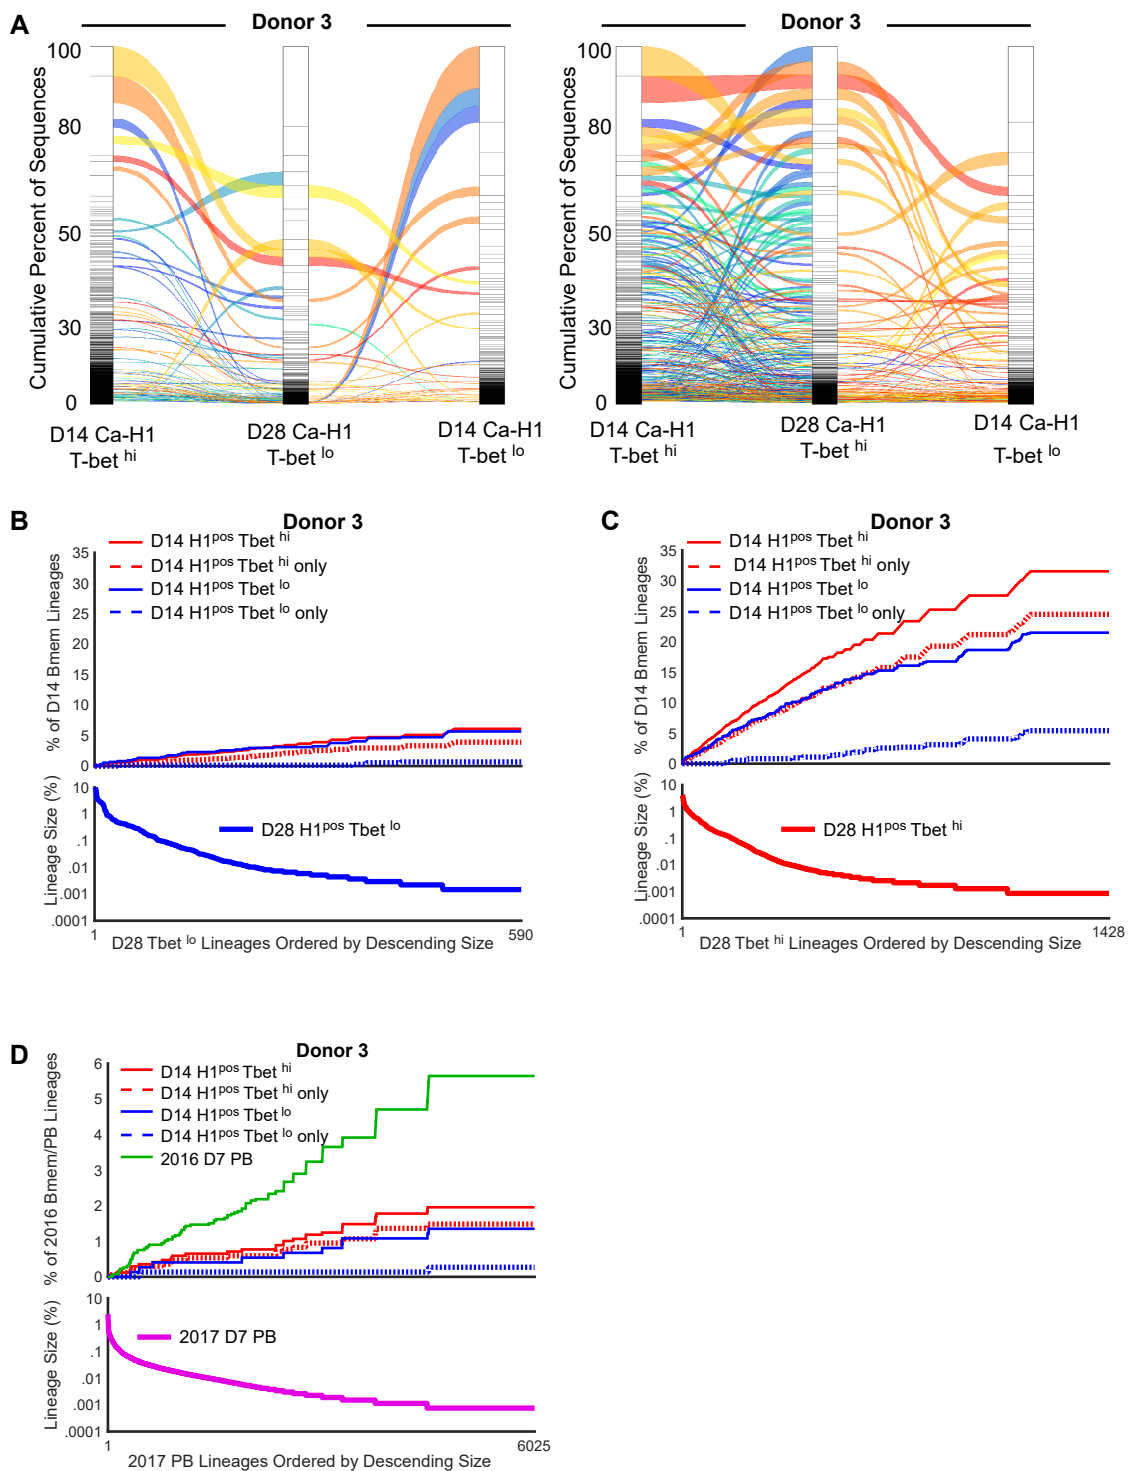

Source: https://www.biorxiv.org/content/10.1101/643973v1.full.pdf
